# 1 **Neurons in Visual Cortex are Driven by Feedback Projections when their Feedforward Sensory Input** 2 **is Missing**

3 Andreas J Keller<sup>1,2</sup>, Morgane M Roth<sup>1,2</sup>, and Massimo Scanziani<sup>1,2</sup>

4 <sup>1</sup>Department of Physiology, University of California San Francisco, San Francisco, California, USA.

5 <sup>2</sup>Howard Hughes Medical Institute, University of California San Francisco, San Francisco, California, USA.

6 **We sense our environment through pathways linking sensory organs to the brain. In the visual**  
7 **system, these feedforward pathways define the classical feedforward receptive field (ffRF), the area**  
8 **in space where visual stimuli excite a neuron<sup>1</sup>. The visual system also uses visual context, the visual**  
9 **scene surrounding a stimulus, to predict the content of the stimulus<sup>2</sup>, and accordingly, neurons have**  
10 **been found that are excited by stimuli outside their ffRF<sup>3-8</sup>. The mechanisms generating excitation to**  
11 **stimuli outside the ffRF are, however, unclear. Here we show that feedback projections onto**  
12 **excitatory neurons in mouse primary visual cortex (V1) generate a second receptive field driven by**  
13 **stimuli outside the ffRF. Stimulating this feedback receptive field (fbRF) elicits slow and delayed**  
14 **responses compared to ffRF stimulation. These responses are preferentially reduced by anesthesia**  
15 **and, importantly, by silencing higher visual areas (HVAs). Feedback inputs from HVAs have**  
16 **scattered receptive fields relative to their putative V1 targets enabling the generation of the fbRF.**  
17 **Neurons with fbRFs are located in cortical layers receiving strong feedback projections and are**  
18 **absent in the main input layer, consistent with a laminar processing hierarchy. The fbRF and the**  
19 **ffRF are mutually antagonistic since large, uniform stimuli, covering both, suppress responses. While**  
20 **somatostatin-expressing inhibitory neurons are driven by these large stimuli, parvalbumin and**  
21 **vasoactive-intestinal-peptide-expressing inhibitory neurons have antagonistic fbRF and ffRF, similar**  
22 **to excitatory neurons. Therefore, feedback projections may enable neurons to use context to predict**  
23 **information missing from the ffRF and to report differences in stimulus features across visual space,**  
24 **regardless if excitation occurs inside or outside the ffRF. We have identified a fbRF which, by**  
25 **complementing the ffRF, may contribute to predictive processing.**

26 To characterize the classical feedforward receptive field (ffRF), we first mapped receptive field locations  
27 of layer 2/3 excitatory neurons in primary visual cortex (V1) in awake head-fixed mice with two-photon  
28 calcium imaging (Fig. 1a). To determine the center of a neuron's ffRF, we used circular patches of drifting  
29 gratings presented individually at different locations (Fig. 1b; see Methods). To estimate the size of the  
30 neuron's ffRF, we obtained a size tuning function by varying the diameter of the grating (from 5 to 85°;  
31 Fig. 1c) centered on the neuron's ffRF and presented at the neuron's preferred orientation (see Methods).  
32 The responses were maximal for gratings of  $13.1 \pm 0.4^\circ$  in diameter (mean  $\pm$  SEM; 1190 neurons in 9 mice)

33 and were strongly suppressed with increasing grating size ( $90 \pm 1\%$  suppression at  $85^\circ$ ; mean  $\pm$  SEM; 1190  
34 neurons in 9 mice). Thus, consistent with previous reports, layer 2/3 excitatory neurons in V1 had a fFRF  
35 diameter greater than  $10^\circ$  on average<sup>9-12</sup> and their responses were suppressed when a stimulus extended  
36 beyond the fFRF to cover surrounding regions<sup>13-15</sup>.

37 To determine the spatial extent of the suppressive regions, we presented a full-field grating in which a  
38 portion was masked by a gray circular patch (Fig. 1a, b). We reasoned that if a large grating suppresses the  
39 excitatory neuron's response because it stimulates suppressive regions surrounding the fFRF, the response  
40 of the excitatory neuron should be partially recovered when a gray patch is placed on a suppressive region,  
41 i.e. when part of the suppressive region is not stimulated. We varied the location of the gray patch along  
42 the same grid used to determine the center of the neuron's fFRF (see Methods). By averaging the responses  
43 to these stimulus grids across neurons, we obtained two separate activity maps; one of the fFRF and one of  
44 the suppressive regions. Unexpectedly, the peak of the map of the suppressive regions overlapped with the  
45 peak of the fFRF map (Fig. 1b). This suggests that, at the population level, the largest recovery from  
46 suppression was obtained when the gray patch was located at the center of the fFRF.

47 Given the relatively low resolution of our maps, the overlap between the two maps could have arisen by  
48 averaging individual neurons each with a suppressive zone at a different location yet adjacent to the fFRF.  
49 To obtain a finer measure of the response amplitude of a neuron to the gray patch, we placed the patch on  
50 the center of the neuron's fFRF and systematically varied its diameter. Even the smallest tested size of the  
51 gray patch ( $5^\circ$ ) placed on the center of the fFRF evoked a response that was larger than the full-field grating  
52 indicating that the resolution of the maps is unlikely to impact our results. Strikingly, neuronal responses  
53 increased with the size of the gray patch up to  $16.6 \pm 0.4^\circ$  (mean  $\pm$  SEM; 1190 neurons in 9 mice) and then  
54 progressively diminished with larger diameters (Fig. 1c). These responses were not a result of the sharp  
55 edges of the stimuli since we observed similar responses when blurring the edges of the border between the  
56 grating and the gray patch (Extended Data Fig. 1). Thus, the dependence of a neuron's response to the size  
57 of a gray patch on a full-field grating was similar to that of a grating patch on a gray background.

58 These results show that layer 2/3 excitatory neurons are not only excited by classical stimuli (grating patches  
59 on a gray background) but are also robustly excited by inverse stimuli (full-field gratings with a gray patch)  
60 centered on a neuron's fFRF. These two stimuli, the classical and the inverse, had an antagonistic impact  
61 on layer 2/3 neurons because the responses of layer 2/3 neurons to both stimuli together (e.g. a full-field  
62 grating) were significantly smaller than the responses to either of the stimuli presented alone (Wilcoxon  
63 signed-rank test;  $p < 10^{-10}$ ; for both classical and inverse stimuli of  $15^\circ$  compared to a large diameter grating,  
64  $85^\circ$ ; Fig. 1c). We thus defined a neuron as inverse tuned if its response to at least one inverse stimulus of

65 any size centered on its fRF was significantly larger than that to a full-field stimulus (see Methods).  
66 According to this criterion, 79% of the visually responsive excitatory neurons in layer 2/3 were inverse  
67 tuned (943 of 1190 neurons in 9 mice; Fig. 1a-c and Extended Data Fig. 2). In addition, we computed the  
68 inverse tuning index (ITI; 0: classical only; 0.5: equal peak responses to classical and inverse stimuli; 1:  
69 inverse only; see Methods). Layer 2/3 excitatory neurons had a unimodal ITI distribution peaking at  $0.52 \pm$   
70  $0.01$  (mean  $\pm$  SEM; Extended Data Fig. 3a).

71 In inverse-tuned neurons, there is a region surrounding the fRF that, when stimulated in the presence of a  
72 stimulus in the fRF, is suppressive while, when stimulated in the absence of a stimulus in the fRF, is  
73 excitatory. We first compared the tuning properties of the surrounding excitatory region with those of the  
74 fRF in layer 2/3 neurons using classical and inverse stimuli at different orientations and directions  
75 (Extended Data Fig. 3b). On average, the orientation tuning to inverse stimuli was sharper than the one to  
76 classical stimuli, and individual neurons showed a wide range of orientation and direction selectivity  
77 indexes for classical and inverse stimuli (Extended Data Fig. 3b-f). Moreover, individual neurons were not  
78 necessarily tuned to the same orientation when stimulated by classical or inverse stimuli (Extended Data  
79 Fig. 3g), indicating that the surrounding excitatory region has its own set of tuning properties. We  
80 determined the interaction between the surrounding excitatory region and the fRF in neurons with similar  
81 orientation preference by varying the contrast of classical or inverse stimuli presented simultaneously  
82 (Extended Data Fig. 3h). With matching contrasts above 13% the mean activity in layer 2/3 excitatory  
83 neurons was lower than when presenting either classical or inverse stimuli alone, indicating an overall  
84 antagonistic interaction between the surrounding excitatory area and the fRF.

85 Is inverse tuning in layer 2/3 excitatory neurons inherited from earlier stages of cortical processing? To this  
86 end, we imaged the activity of excitatory neurons in layer 4, the main cortical feedforward input layer, by  
87 conditionally expressing GCaMP6f (Fig. 1d-f). As for layer 2/3 excitatory neurons, we first estimated the  
88 fRF center and the size dependence of the response for each neuron using classical stimuli. We then used  
89 inverse stimuli to determine the location of the suppressive regions. In striking contrast to what we observed  
90 in layer 2/3, the suppressive regions of layer 4 neurons surrounded their fRF, creating a ring around the  
91 center (Fig. 1e). Further, the responses of layer 4 neurons to inverse stimuli placed on the center of the fRF  
92 decreased monotonically with the size of the stimulus, which was markedly different from layer 2/3 neurons  
93 (Fig. 1c vs Fig. 1f). This decrease in the response of layer 4 neurons is consistent with the progressive  
94 reduction of feedforward drive (Extended Fig. 2). Thus, we found no evidence of inverse tuning in layer 4  
95 neurons (ITI:  $0.10 \pm 0.02$ ; mean  $\pm$  SEM). Overall, the spatial organization of suppressive regions of layer  
96 4 neurons relative to their fRFs is in agreement with previous models and observations<sup>7,16</sup> and importantly,  
97 distinct from layer 2/3 neurons.

98 Could our inability to resolve a suppressive ring around the ffRF of layer 2/3 neurons be due to an  
99 insufficient spatial resolution of the mapping stimuli (20° patches with a 15° spacing)? We compared our  
100 receptive field estimates to those obtained with a finer grid (10° patches with a 5° spacing) and found that  
101 both estimations were similar (Extended Data Fig. 4a, b). Additionally, we specifically analyzed layer 2/3  
102 neurons with larger ffRFs, comparable to the sizes observed in layer 4 (i.e. preferred size >15°; Extended  
103 Data Fig. 4c, d). The classical size tuning function of this subpopulation was almost indistinguishable from  
104 that of layer 4 neurons (Extended Data Fig. 4d). Yet, in contrast to layer 4 neurons, their suppressive region  
105 still colocalized with the peak of the ffRF (Extended Data Fig. 4c). Thus, inverse tuning in layer 2/3  
106 excitatory neurons is not simply inherited from layer 4 neurons and hence represents an operation that  
107 emerges along the cortical laminar hierarchy.

108 Sources of input to layer 2/3 neurons are neuron-type specific<sup>14,17</sup>. Is inverse tuning also present in layer  
109 2/3 inhibitory neurons? To determine whether the three major classes of cortical inhibitory neurons, the  
110 parvalbumin- (PV), vasoactive-intestinal-peptide- (VIP) and somatostatin-expressing (SOM) neurons, are  
111 also inverse tuned, we conditionally expressed GCaMP6f in each of these three classes and characterized  
112 their responses to classical and inverse stimuli (Fig. 2). For both PV and VIP cells the classical and the  
113 inverse maps peaked and overlapped around the center of the ffRF (Fig. 2b, c). Furthermore, both PV and  
114 VIP cells showed surround suppression to classical stimuli, consistent with previous reports<sup>14</sup> and size  
115 tuning functions to inverse stimuli that peaked well above the response of the neuron to the largest classical  
116 stimuli. In contrast, SOM cells only showed, on average, a poor and spatially diffuse response to inverse  
117 stimuli (Fig. 2d), little surround suppression to classical stimuli<sup>14</sup> and no response to inverse stimuli above  
118 the response to the largest classical stimuli. Thus, the majority of PV and VIP neurons were inverse tuned  
119 (97%; 58 of 60; ITI:  $0.52 \pm 0.02$ ; mean  $\pm$  SEM and 58%; 43 of 74; ITI:  $0.42 \pm 0.02$ ; mean  $\pm$  SEM,  
120 respectively), similar to layer 2/3 excitatory neurons, while most SOM were not (30% inverse tuned; 54 of  
121 179; ITI:  $0.22 \pm 0.02$ ; mean  $\pm$  SEM).

122 Inverse tuning is therefore a ubiquitous property of layer 2/3 neurons but absent in layer 4. Even though  
123 our results show that inverse-tuned layer 2/3 neurons do not directly inherit this property from layer 4, the  
124 excitatory region surrounding these layer 2/3 neurons could still be generated via feedforward inputs from  
125 layer 4 with spatially offset ffRFs (Fig. 3a). Alternatively, the excitatory region surrounding layer 2/3  
126 neurons could be generated via feedback projections, as feedforward projections only represent the minority  
127 of excitatory inputs onto those neurons<sup>18,19</sup>. To address this, we compared the latency of the responses of  
128 inverse-tuned neurons to classical and inverse stimuli using extracellular electrophysiological recordings.  
129 We inserted a multichannel linear probe into V1 (Fig. 3a) and used classical stimuli to determine the ffRF  
130 location of the recorded neurons, as described for calcium imaging. This approach allowed us to record

131 isolated single units throughout the cortical layers, including infragranular layers (layer 5/6). Interestingly,  
132 we found that a large fraction of infragranular units (50%, 60 of 119 units; ITI:  $0.40 \pm 0.03$ ; mean  $\pm$  SEM)  
133 were also inverse tuned (Extended Data Fig. 5). In inverse-tuned units recorded in both supra- and  
134 infragranular layers the time course of the responses to classical and inverse stimuli were markedly  
135 different, as shown by their peristimulus time histograms (PSTHs; Fig. 3b). While the time course of the  
136 response to classical stimuli was characterized by a fast initial transient followed by a response plateau, the  
137 response to inverse stimuli showed a significantly slower progression towards steady state (Fig. 3c-e, see  
138 Methods). Further, the response to inverse stimuli was delayed relative to the classical response ( $50 \pm 20$   
139 ms; mean  $\pm$  SEM; 15 units; Fig. 3f). The same biases were observed when comparing the response dynamics  
140 to classical stimuli in all responsive neurons to those to inverse stimuli in inverse-tuned neurons (Fig. 3g).  
141 This difference in latencies and the slower dynamics of responses to inverse stimuli suggest that inverse  
142 tuning may involve additional processing steps and is thus unlikely to emerge from the feedforward  
143 pathway.

144 Could the responses to inverse stimuli depend on feedback projections from higher visual areas (HVAs)?  
145 To this end, we harnessed the impact of anesthesia on the sensory responses of neurons, which has been  
146 suggested to be more pronounced in HVAs than in V1<sup>20</sup>. We verified the differential effect of anesthesia  
147 by comparing the impact of isoflurane on the responses to classical stimuli in V1 and in HVAs identified  
148 beforehand using wide-field intrinsic imaging (see Methods). Indeed, responses were significantly more  
149 suppressed by anesthesia in HVAs than in V1 (Extended Data Fig. 6). If the responses of layer 2/3 neurons  
150 to inverse stimuli rely on feedback projections, they should therefore be more sensitive to anesthesia than  
151 the responses of the same neurons to classical stimuli. We imaged layer 2/3 excitatory neurons first in  
152 awake mice while presenting classical and inverse stimuli, and then imaged the same neurons under  
153 isoflurane anesthesia (Fig. 4a). In inverse-tuned neurons, anesthesia strongly suppressed the responses to  
154 inverse stimuli (peak response reduction of  $64 \pm 4\%$ ; mean  $\pm$  SEM; 49 neurons; Fig. 4b, c) while the  
155 responses to classical stimuli were only weakly affected (peak response reduction of  $7 \pm 13\%$ ; mean  $\pm$   
156 SEM; same 49 neurons; Fig. 4b, c). This was also the case for neurons whose peak response was larger to  
157 inverse than to classical stimuli (Fig. 4c). Thus, anesthesia has a stronger impact on the amplitude of the  
158 responses to inverse stimuli, consistent with the hypothesis that it is mainly driven by feedback projections.

159 To directly test the involvement of top-down feedback projections on inverse tuning, we optogenetically  
160 silenced HVAs while recording extracellular electrophysiological activity in V1 (Fig. 5a-e). We silenced  
161 cortical activity by scanning a laser beam across HVAs to optogenetically activate inhibitory neurons  
162 expressing Channelrhodopsin-2 (ChR2; Fig. 5a). Control recordings confirmed that this procedure  
163 efficiently silenced cortical activity in areas targeted by laser stimulation (Extended Data Fig. 7a-c). In

164 inverse-tuned units, silencing HVAs reduced spontaneous activity and responses to classical stimuli, in  
165 particular those of smaller diameters and, as previously shown, increased the activity for large stimuli in  
166 surround suppressed units<sup>21-23</sup> (Fig. 5b-d; Extended Data Fig. 8). The response to inverse stimuli, however,  
167 was strongly suppressed (Fig. 5b-e). Upon silencing HVAs, inverse stimuli evoked responses reminiscent  
168 of those observed in layer 4 that decreased with increasing size of the gray patch, as would be expected by  
169 the progressive masking of a stimulus. These effects cannot be explained by a direct impact of scattered  
170 laser light on V1 as the effect of laser stimulation on ChR2-expressing inhibitory neurons decreased rapidly  
171 with distance. Indeed, the stimulation was insufficient to increase the activity of ChR2-expressing inhibitory  
172 units in V1 beyond 400  $\mu\text{m}$  from the center of stimulation or when silencing HVAs (Extended Data Fig.  
173 7d-g; see Methods). Silencing HVAs by activating local inhibitory neurons, however, could also impact V1  
174 activity if these inhibitory neurons were to send long-range projections to V1. To test this possibility, we  
175 injected a retrogradely transported virus to conditionally express a fluorescent reporter in inhibitory neurons  
176 projecting to the injection site (Extended Data Fig. 7h-l). Consistent with previous reports<sup>24</sup>, we observed  
177 very few retrogradely labelled inhibitory neuron somata in HVAs (HVAs:  $4.3 \pm 0.9$  neurons; V1:  $510 \pm 10$   
178 neurons; mean  $\pm$  SEM; 3 mice) indicating that direct inhibitory projections from HVAs to V1 are rare and  
179 therefore unlikely to impact our results.

180 Do HVAs contribute equally to inverse responses in V1? To test this, we silenced individual HVAs while  
181 recording single unit responses in V1 to classical and inverse stimuli (Extended Data Fig. 9). While the  
182 silencing of several visual areas reduced the response to inverse stimuli, the strongest stimulus-specific  
183 effect on inverse responses was observed when silencing the lateromedial visual area (LM).

184 Is inverse tuning directly inherited from inverse-tuned neurons in HVAs? To address this question, we  
185 expressed GCaMP6f in LM and RGECO1a in V1 to determine the responses properties of LM axonal  
186 boutons in layer 1 of V1 while mapping the retinotopic coordinates of the V1 site (Fig. 5f-i; Extended Data  
187 Fig. 10a-h). LM boutons whose receptive fields were centered on the retinotopic coordinates of the imaged  
188 V1 site (11% of all visually responsive boutons; 87 of 800), showed surround suppression to classical  
189 stimuli and were not inverse tuned (ITI:  $0.14 \pm 0.01$ ; mean  $\pm$  SEM; Fig. 5g). When presenting an inverse  
190 stimulus centered on the receptive field of the LM boutons, the response decreased with increasing diameter  
191 of the gray patch, similar to what observed in layer 4 neurons in V1 (Fig. 1f). This was not a general property  
192 of LM neurons since directly imaging cell bodies in LM showed inverse tuning in some of the neurons, and  
193 in the population average (ITI:  $0.33 \pm 0.02$ ; mean  $\pm$  SEM; Extended Data Fig. 10i-k). Thus, V1 neurons do  
194 not directly inherit inverse tuning from LM because those LM neurons that project back onto matching  
195 retinotopic coordinates in V1 show no inverse tuning.



196 Inverse tuning of layer 2/3 neurons could result from LM inputs which, while *per se* not inverse tuned, have  
197 spatially offset receptive fields relative to those of layer 2/3 neurons. These LM inputs would respond to an  
198 inverse stimulus centered on the V1 retinotopic coordinates because their receptive field, being offset  
199 relative to the gray patch, would be directly stimulated by the grating. We mapped the spatial offset of the  
200 receptive field of LM boutons relative to the retinotopic coordinates of the V1 sites. The receptive field  
201 centers of LM boutons showed a wide scatter relative to the retinotopic coordinates of the V1 site, larger  
202 than the scatter of receptive field centers of layer 2/3 neurons at the V1 site, and consistent with a previous  
203 study<sup>25</sup> (Fig. 5h; Extended Data Fig. 10f, g). Thus, LM boutons with spatially offset receptive field centers  
204 converge on a given retinotopic site in V1. If these LM inputs contribute to the inverse response of layer  
205 2/3 neurons, they should respond to inverse stimuli centered on the V1 site. This was indeed the case on  
206 average and a large fraction of these boutons significantly responded to inverse stimuli (51% of the non-  
207 aligned boutons; 362 of 711; or 45% of all visually responsive boutons; 362 of 800; Extended Data Fig.  
208 10h). Furthermore, these boutons responded robustly to all tested inverse stimuli, predominantly to small  
209 stimulus sizes (Fig. 5i), consistent with the inverse size tuning in layer 2/3 neurons (Fig. 1c). In addition,  
210 the response of these boutons to progressively larger stimuli centered on the V1 site increased gradually  
211 (Fig. 5i), consistent with their receptive fields being offset relative to the center of the stimulus. Thus, these  
212 results show that inverse tuning in layer 2/3 V1 neurons likely results from the feedback of non-inverse-  
213 tuned neurons in HVAs whose receptive fields are offset relative to the receptive field centers of the V1  
214 neurons they converge on.

215 In conclusion, our results demonstrate that feedback projections to V1 neurons generate a second, distinct  
216 excitatory receptive field that surrounds the ffRF. This feedback receptive field (fbRF) is absent in layer 4,  
217 the main feedforward input layer, and emerges along the laminar processing hierarchy in the supra- and  
218 infragranular layers of V1. Neurons in V1 receive feedback projections originating from HVAs, yet whether  
219 these projections merely modulate or are actually capable of driving V1 neurons has remained a matter of  
220 debate<sup>15,26,27</sup>. Our data clearly show that feedback from HVAs is capable of driving V1 neurons and that  
221 this drive comes, at least in part, from retinotopically offset neurons. Further, we show that the fbRF and  
222 the ffRF are mutually antagonistic when stimulated with uniform stimuli and that this antagonism is not  
223 exclusive to excitatory neurons but also present in inhibitory neurons expressing PV and VIP. Through this  
224 antagonism, neurons respond when a stimulus is presented in either the fbRF or ffRF but not in both  
225 together, effectively performing an exclusive-OR operation. Suppression of responses to stimuli in the ffRF  
226 by surrounding stimuli is a well-established phenomenon that enables neurons to report boundaries by  
227 detecting differences in stimulus features between the excited region inside the ffRF and their  
228 surround<sup>7,8,14,15,28-31</sup>. Our results show that neurons with an excitatory fbRF report differences in stimulus

229 features regardless of whether the excited region is located inside or outside the fRF. This may represent  
230 a generalization in the ability to detect boundaries across visual space. While the mechanisms underlying  
231 the mutual antagonism between the fbRF and the fRF remains to be elucidated, we hypothesize that SOM  
232 inhibitory neurons, which, in contrast to PV and VIP inhibitory neurons, respond poorly to inverse stimuli  
233 while robustly responding to large stimuli covering both the fbRF and the fRF, could be responsible for  
234 this operation. Indeed, functional elimination of SOM neurons has been shown to relieve excitatory neurons  
235 from the suppression mediated by large stimuli<sup>14</sup>.

236 Our data establish a role of HVAs in the generation of the fbRF, however, we cannot exclude a contribution  
237 of local excitation within V1<sup>32,33</sup>. Regardless, the presence of a fbRF may underlie phenomena such as  
238 filling-in or illusory contours in which the stimulus in the fRF is absent or obstructed<sup>4,5,34–36</sup>. Similarly, a  
239 fbRF may account for the reported interactions between excitatory regions outside and inside the fRF as a  
240 basis for contextual modulation<sup>8,15,28,37,38</sup>, detection of borders<sup>6,7</sup> or pop-out effects<sup>39</sup>.

241 The antagonism between feedback excitation descending from HVAs and feedforward excitation ascending  
242 from the periphery is reminiscent of models of predictive processing<sup>27,40,41</sup>. In these models, bottom-up  
243 information about the stimulus is compared with top-down predictions based on experience, such that only  
244 errors between prediction and stimulus identity are represented and passed along to update the prediction.  
245 Surround suppression has been interpreted within the framework of predictive processing in space because  
246 if the visual stimulus surrounding the fRF of a neuron is a good predictor for the stimulus in the fRF there  
247 is no error between stimulus prediction and identity and, therefore, the response of that neuron is  
248 suppressed<sup>40</sup>. Without inverse tuning, as in layer 4 neurons, errors are only generated when there is a  
249 stronger stimulus present in the fRF than expected based on the surround (e.g. no stimulus in the surround),  
250 but not for the inverse situation when the stimulus is weaker in the fRF than expected based on the surround  
251 (e.g. stimulus only in the surround). With inverse tuning, as in layer 2/3 neurons, the framework of  
252 predictive processing generalizes to stimuli within and outside of the fRF due to the presence of a fbRF. It  
253 will be important to determine the extent to which visual experience is necessary to generate the fbRFs.



## 254 References

- 255 1. Hubel, D. H. & Wiesel, T. N. Receptive Fields, Binocular Interaction and Functional Architecture in the  
256 Cat's Visual Cortex. *J. Physiol.* **160**, 106–154 (1962).
- 257 2. Pennartz, C. M. A., Dora, S., Muckli, L. & Lorteije, J. A. M. Towards a Unified View on Pathways and  
258 Functions of Neural Recurrent Processing. *Trends Neurosci.* 1–15 (2019). doi:10.1016/j.tins.2019.07.005
- 259 3. Shen, Z.-M., Xu, W.-F. & Li, C.-Y. Cue-invariant detection of centre-surround discontinuity by V1 neurons  
260 in awake macaque monkey. *J Physiol* 581–592 (2007). doi:10.1113/jphysiol.2007.130294
- 261 4. Von der Heydt, R., Peterhans, E. & Baumgartner, G. Illusory Contours and Cortical Neuron Responses.  
262 *Science* **224**, 1260–1262 (1984).
- 263 5. Fiorani, M., Rosa, M. G. P., Gattass, R. & Rocha-Miranda, C. E. Dynamic surrounds of receptive fields in  
264 primate striate cortex : A physiological basis for perceptual completion? *Proc. Natl. Acad. Sci. USA* **89**,  
265 8547–8551 (1992).
- 266 6. Rossi, A. F., Desimone, R. & Ungerleider, L. G. Contextual Modulation in Primary Visual Cortex of  
267 Macaques. *J. Neurosci.* **21**, 1698–1709 (2001).
- 268 7. Jones, H. E., Grieve, K. L., Wang, W. & Sillito, A. M. Surround Suppression in Primate V1. *Am. Physiol.*  
269 *Soc.* 2011–2028 (2001).
- 270 8. Schnabel, U. H. *et al.* Figure-ground perception in the awake mouse and neuronal activity elicited by figure-  
271 ground stimuli in primary visual cortex. *Sci. Rep.* 1–14 (2018). doi:10.1038/s41598-018-36087-8
- 272 9. Hubener, M. Mouse visual cortex. *Curr. Opin. Neurobiol.* **13**, 413–420 (2003).
- 273 10. Mangini, N. J. & Pearlman, A. L. Laminar Distribution of Receptive Field Properties in the Primary Visual  
274 Cortex of the Mouse. *J. Comp. Neurol.* **193**, 203–222 (1980).
- 275 11. Metin, C., Godement, P. & Imbert, M. The primary visual cortex in the mouse: receptive field properties and  
276 functional organization. *Exp. Brain Res.* **69**, 594–612 (1988).
- 277 12. Niell, C. M. & Stryker, M. P. Highly Selective Receptive Fields in Mouse Visual Cortex. *J. Neurosci.* **28**,  
278 7520–7536 (2008).
- 279 13. Blakemore, C. & Tobin, E. A. Lateral Inhibition Between Orientation Detectors in the Cat's Visual Cortex.  
280 *Exp. Brain Res.* **15**, 439–440 (1972).
- 281 14. Adesnik, H., Bruns, W., Taniguchi, H., Huang, Z. J. & Scanziani, M. A neural circuit for spatial summation  
282 in visual cortex. *Nature* **490**, 226–231 (2012).
- 283 15. Angelucci, A. *et al.* Circuits and Mechanisms for Surround Modulation in Visual Cortex. *Annu. Rev.*  
284 *Neurosci.* **40**, 425–451 (2017).
- 285 16. Walker, G. A., Ohzawa, I. & Freeman, R. D. Asymmetric suppression outside the classical receptive field of  
286 the visual cortex. *J. Neurosci.* **19**, 10536–10553 (1999).
- 287 17. Callaway, E. M. Cell type specificity of local cortical connections. *J. Neurocytol.* **31**, 231–237 (2002).
- 288 18. Perrella, M. From single neurons to the matrix. (ETH Zurich, 2013).
- 289 19. Binzegger, T., Douglas, R. J. & Martin, K. A. C. A Quantitative Map of the Circuit of Cat Primary Visual  
290 Cortex. *J. Neurosci.* **24**, 8441–8453 (2004).
- 291 20. Lamme, V. A. F., Zipser, K. & Spekreijse, H. Figure-ground activity in primary visual cortex is suppressed  
292 by anesthesia. *Proc. Natl. Acad. Sci.* **95**, 3263–3268 (1998).
- 293 21. Nassi, J. J., Lomber, S. G. & Born, R. T. Corticocortical Feedback Contributes to Surround Suppression in  
294 V1 of the Alert Primate. *J. Neurosci.* **33**, 8504–8517 (2013).
- 295 22. Nurminen, L., Merlin, S., Bijanzadeh, M., Federer, F. & Angelucci, A. Top-down feedback controls spatial  
296 summation and response amplitude in primate visual cortex. *Nat. Commun.* **9**, (2018).
- 297 23. Vangeneugden, J. *et al.* Activity in Lateral Visual Areas Contributes to Surround Suppression in Awake  
298 Mouse V1. *Curr. Biol.* **29**, 1–8 (2019).
- 299 24. McDonald, C. T. & Burkhalter, A. Organization Cortex of Long-Range Inhibitory Connections within Rat  
300 Visual Cortex. *J. Neurosci.* **13**, (1993).
- 301 25. Marques, T., Nguyen, J., Fioreze, G. & Petreanu, L. The functional organization of cortical feedback inputs  
302 to primary visual cortex. *Nat. Neurosci.* **21**, (2018).
- 303 26. Mignard, M. & Malpeli, J. G. Paths of Information Flow Through Visual Cortex. *Science* **251**, 1249–1251  
304 (1991).
- 305 27. Bastos, A. M. *et al.* Canonical Microcircuits for Predictive Coding. *Neuron* **76**, 695–711 (2012).
- 306 28. Kapadia, M. K., Westheimer, G. & Gilbert, C. D. Spatial Distribution of Contextual Interactions in Primary  
307 Visual Cortex and in Visual Perception. *Am. Physiol. Soc.* (2000).
- 308 29. Maffei, L. & Fiorentini, A. The Unresponsive Regions of Visual Cortical Receptive Fields. *Vis. Res.* **16**,

- 309 1131–1139 (1976).  
310 30. DeAngelis, G. C., Freeman, R. D. & Ohzawa, I. Length and Width Tuning of Neurons in the Cat’s Primary  
311 Visual Cortex. *J. Neurophysiol.* **71**, 347–74 (1994).  
312 31. Self, M. W. *et al.* Orientation-Tuned Surround Suppression in Mouse Visual Cortex. *J. Neurosci.* **34**, 9290–  
313 9304 (2014).  
314 32. Gilbert, C. D. & Wiesel, T. N. Columnar Specificity of Intrinsic Horizontal Connections in Cat Visual  
315 Cortex and Corticocortical Connections in Cat Visual Cortex. *J. Neurosci.* **9**, 2432–2442 (1989).  
316 33. Fitzpatrick, D. Seeing beyond the receptive field in primary visual cortex. *Curr. Opin. Neurobiol.* **10**, 438–  
317 443 (2000).  
318 34. Peterhans, E. & Von der Heydt, R. Mechanisms of Contour Perception Contours Bridging Gaps in Monkey  
319 Visual Cortex. II. Contours Bridging Gaps. *J. Neurosci.* **9**, 1749–1763 (1989).  
320 35. Smith, F. W. & Muckli, L. Nonstimulated early visual areas carry information about surrounding context.  
321 *PNAS* **107**, 20099–20103 (2010).  
322 36. Grosof, D. H., Shapley, R. M. & Hawken, M. J. Macaque V1 neurons can signal ‘illusory’ contours. *Nature*  
323 **365**, 550–552 (1993).  
324 37. Seriès, P., Lorenceau, J. & Frégnac, Y. The ‘silent’ surround of V1 receptive fields: theory and experiments.  
325 *J. Physiol. Paris* **97**, 453–474 (2003).  
326 38. Bringuier, V., Frederic Chavane, Glaeser, L. & Fregnac, Y. Horizontal Propagation of Visual Activity in the  
327 Synaptic Integration Field of Area 17 Neurons. *Science* **283**, 695–700 (1999).  
328 39. Knierim, J. J. & van Essen, D. C. Neuronal responses to static texture patterns in area V1 of the alert  
329 macaque monkey. *J. Neurophysiol.* **67**, 961–980 (1992).  
330 40. Rao, R. P. & Ballard, D. H. Predictive coding in the visual cortex: a functional interpretation of some extra-  
331 classical receptive-field effects. *Nat. Neurosci.* **2**, 79–87 (1999).  
332 41. Keller, G. B. & Mrsic-Flogel, T. D. Predictive Processing: A Canonical Cortical Computation. *Neuron* **100**,  
333 424–435 (2018).

334 **Acknowledgements.** We thank M. Mukundan, B. Wong, and L. Bao for technical support, R. Beltramo for  
335 helping with extracellular recordings, J. Isaacson, G. Keller, R. Nicoll, and M. Heindorf for comments on  
336 the manuscript and the members of the Scanziani laboratory for helpful discussions of this project as well  
337 as for comments on the manuscript. This project was supported by the NIH grant U19NS107613, the  
338 Howard Hughes Medical Institute and the Swiss National Science Foundation grants P300PA\_177882 and  
339 P2E2P3\_162284 to A.J.K and P300PA\_177898 to M.M.R. Confocal images were acquired at the Nikon  
340 Imaging Center at UCSF.

341 **Author contributions.** A.J.K. and M.S. designed the study. A.J.K. and M.M.R. conducted all experiments  
342 and analysis. M.S., A.J.K. and M.M.R wrote the manuscript.

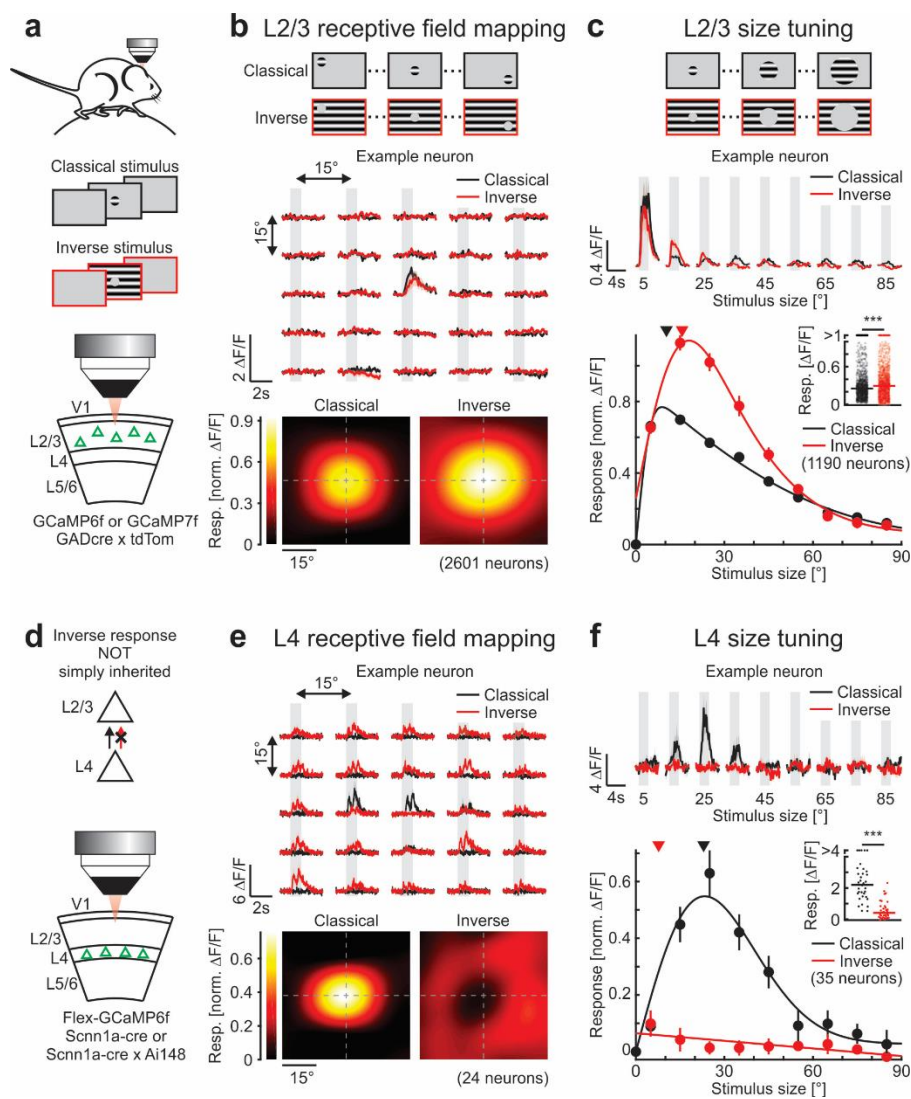

343

344 **Figure 1 | Layer-specific responses to inverse stimuli.** **a**, Experimental configuration. Classical or inverse stimuli  
 345 are presented to awake mice while imaging calcium responses in layer 2/3 excitatory neurons of primary visual cortex  
 346 (V1). **b**, Top: Schematic of receptive field mapping. Center: Trial-averaged calcium responses from an example  
 347 neuron for each stimulus location. Here and in all other figures, black and red traces are responses to classical and  
 348 inverse stimuli, respectively, and shaded areas are periods of stimulus presentation. Bottom: Population-averaged  
 349 receptive field for responses to classical or inverse stimuli aligned to the center of the classical feedforward receptive  
 350 field (ffRF). Note the strong overlap of the receptive fields mapped with classical or inverse stimuli (2601 neurons in  
 351 9 mice). **c**, Top: Schematic of stimuli used for size tuning functions. Center: Trial-averaged calcium responses from  
 352 an example neuron for each stimulus size. Classical and inverse stimuli are centered on the ffRF. Bottom: Size tuning  
 353 functions to classical and inverse stimuli. For every neuron, both size tuning functions are normalized by their  
 354 maximum response to classical stimuli. Solid lines are fits to the data (see Methods). Triangles indicate median  
 355 preferred size. Inset: Maximum responses. Horizontal lines, medians. Wilcoxon signed-rank test; \*:  $p < 10^{-4}$ ; 1190  
 356 neurons in 9 mice. **d**, Schematic of results and experimental configuration. **e** and **f**, As above but for layer 4 excitatory  
 357 neurons (24 neurons in 4 mice). Note that, in contrast to **(b)**, the responses to inverse stimuli surrounds the ffRF **(e)**.  
 358 Also note the monotonically decreasing inverse size tuning function in **(f)** as compared to **(c)**. Wilcoxon signed-rank  
 359 test; \*\*\*:  $p < 10^{-6}$ ; 35 neurons in 6 mice. Traces and data points represent mean  $\pm$  SEM (shading or error bars,  
 360 respectively). Here and in all other figures, error bars are present but sometimes smaller than symbols.

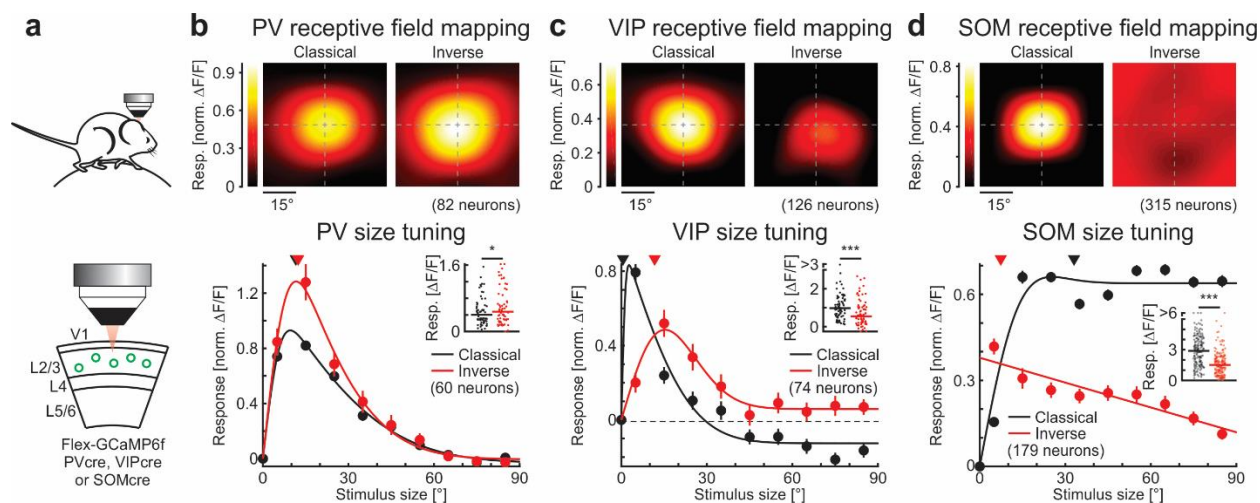

361

362 **Figure 2 | Neuron-type specific response to inverse stimuli.** **a**, Experimental configuration. Classical or inverse  
 363 stimuli are presented to awake mice while imaging calcium responses in layer 2/3 parvalbumin-positive (PV),  
 364 vasoactive-intestinal-peptide-positive (VIP), or somatostatin-positive (SOM) inhibitory neurons in V1. **b**, Top:  
 365 Population-averaged receptive field for PV inhibitory neuron responses to classical or inverse stimuli aligned to the  
 366 center of the fFRF (82 neurons in 6 mice). Bottom: Size tuning functions to classical and inverse stimuli. For every  
 367 neuron, both size tuning functions are normalized by their maximum response to classical stimuli. Solid lines are fits  
 368 to the data (see Methods). Triangles indicate median preferred size. Inset: Maximum responses. Horizontal lines,  
 369 medians. Wilcoxon signed-rank test; \*:  $p = 0.021$ ; 60 neurons in 7 mice. **c**, Same as in (**b**) but for VIP inhibitory  
 370 neurons. Top: 126 neurons in 4 mice. Bottom: Wilcoxon signed-rank test; \*\*\*:  $p = 3.6 \times 10^{-4}$ ; 74 neurons in 8 mice.  
 371 **d**, Same as in (**b**) but for SOM inhibitory neurons. Top: 315 neurons in 5 mice. Bottom: Wilcoxon signed-rank test;  
 372 \*\*\*:  $p < 10^{-10}$ ; 179 neurons in 5 mice.



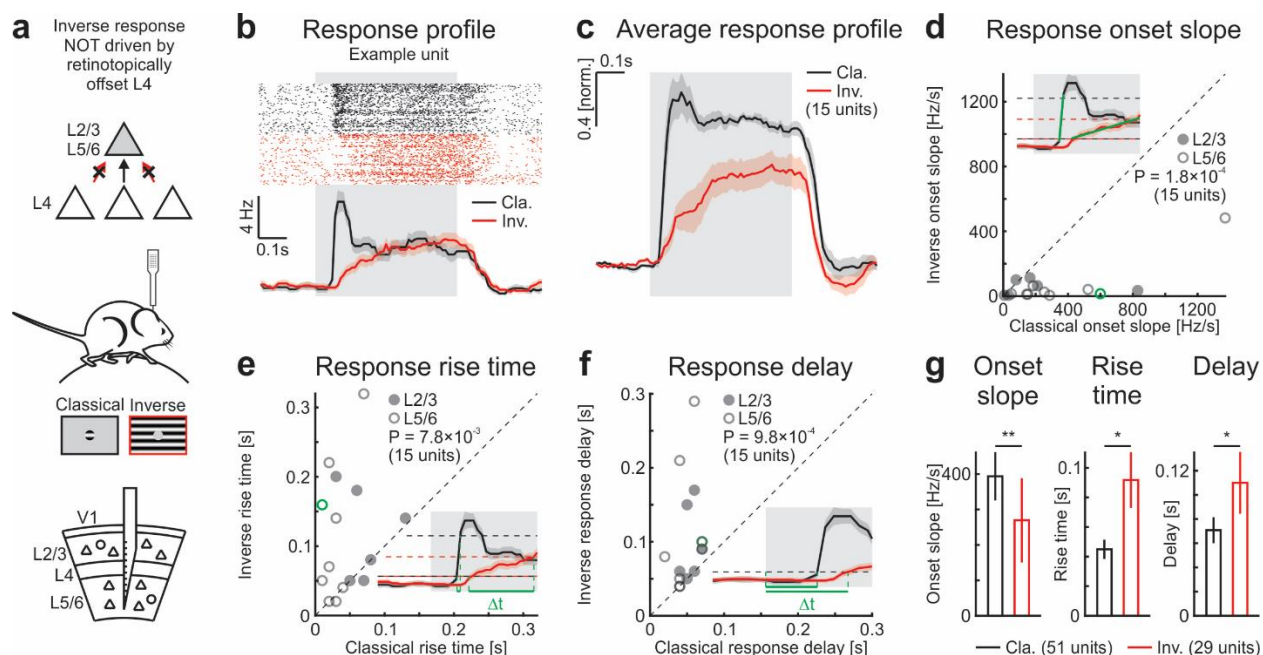

373

374 **Figure 3 | Slow and delayed responses to inverse stimuli.** **a**, Schematic of results and experimental configuration  
 375 for extracellular recordings in V1. **b**, Response of an example unit in layer 5/6 to classical and inverse stimuli centered  
 376 on the ffRF. Top: Raster plot for classical and inverse stimuli (1000 trials each). The initial phase of the drifting grating  
 377 was randomized for each trial. Bottom: Peristimulus time histogram (PSTH; 10 ms bins). **c**, Population average of  
 378 normalized PSTHs (15 units in 4 mice). For every unit, PSTH was normalized by the average activity to the classical  
 379 stimulus. **d**, Scatter plot of the onset slope of the response to classical and inverse stimuli. Closed and open symbols  
 380 are units from layers 2/3 and 5/6, respectively. Green symbol represents the example unit shown in **(b)**. Inset: PSTH  
 381 from **(b)** to illustrate differences in slopes. Horizontal dotted lines are lower and upper thresholds to compute the  
 382 slopes (see Methods). Darker symbols are overlapping data points. Wilcoxon signed-rank test;  $p = 1.8 \times 10^{-4}$ ; 15 units  
 383 4 mice. **e**, Same as **(d)** but for rise time. Wilcoxon signed-rank test;  $p = 7.8 \times 10^{-3}$ ; 15 units in 4 mice. **f**, Same as **(d)**  
 384 but for delay. Wilcoxon signed-rank test;  $p = 9.8 \times 10^{-4}$ ; 15 units in 4 mice. **g**, Mean onset slopes, rise times, and  
 385 delays for classical and inverse stimuli of units that were tuned to either the classical or the inverse stimulus (see  
 386 Methods). Wilcoxon rank-sum test; onset slope, \*\*:  $p = 1.1 \times 10^{-3}$ ; rise time, \*:  $p = 0.017$ ; delay, \*:  $p = 0.031$ ; classical:  
 387 51 units in 8 mice; inverse: 29 units in 8 mice. Traces and bars represent mean  $\pm$  SEM (shading or error bars,  
 388 respectively).

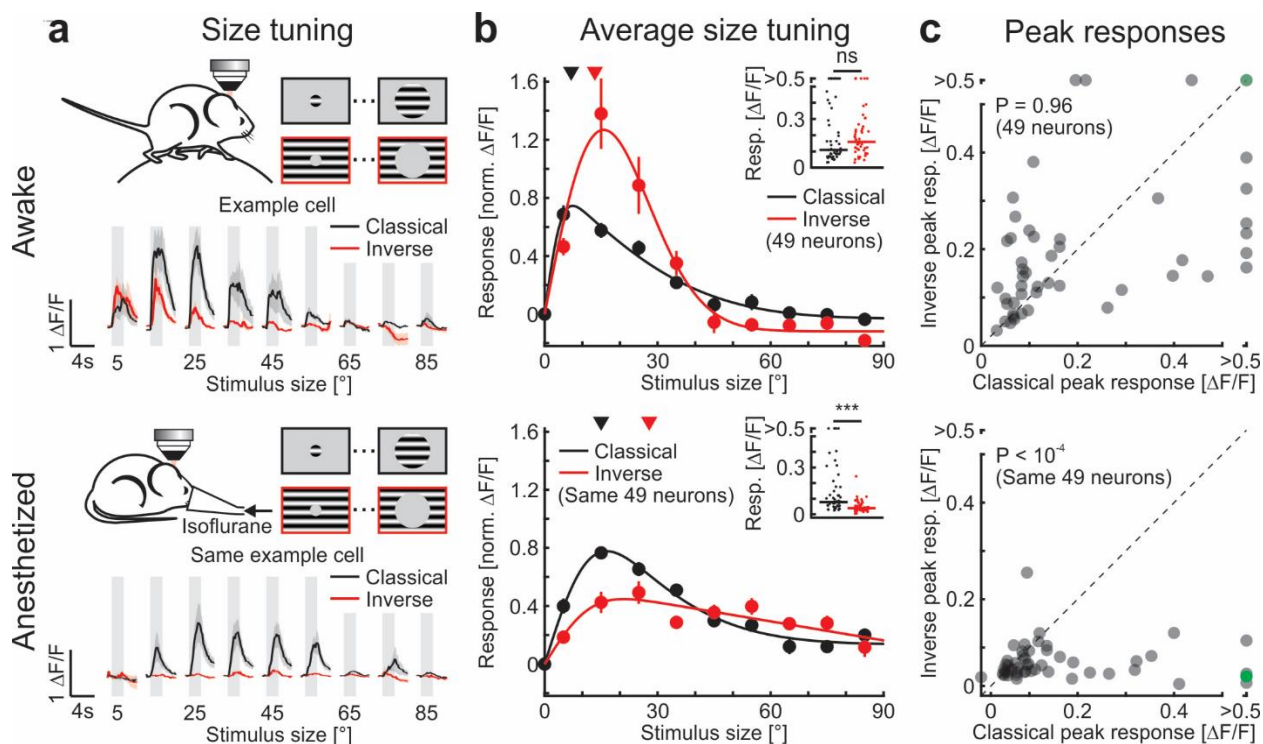

389

390 **Figure 4 | Anesthesia preferentially reduces responses to inverse stimuli.** **a**, Top diagram: Experimental  
 391 configuration as in Fig. 1a. Top traces: Calcium responses of an example neuron to classical and inverse stimuli of  
 392 different sizes in an awake mouse. Bottom: Same example neuron but under isoflurane anesthesia. Note the larger  
 393 reduction of responses to inverse than to classical stimuli. **b**, Population-averaged size tuning functions for classical  
 394 and inverse stimuli in awake (top) and anesthetized (bottom) mice (top and bottom: same 49 neurons). For every  
 395 neuron, each size tuning function is normalized by the maximum awake response to the classical stimulus. Solid lines  
 396 are fits to the data (see Methods). Triangles are median preferred size. Insets: Maximum responses. Horizontal lines,  
 397 medians. Top: Wilcoxon signed-rank test; ns:  $p = 0.96$ ; 49 neurons in 5 mice. Bottom: Wilcoxon signed-rank test;  
 398 \*\*\*:  $p < 10^{-4}$ ; same 49 neurons. **c**, Scatter plot of peak responses of inverse-tuned neurons to classical and inverse  
 399 stimuli in awake (top) and anesthetized (bottom) mice (top and bottom: same 49 neurons). Green symbol represents  
 400 the example neuron shown in (a). Wilcoxon signed-rank test; top:  $p = 0.96$ ; bottom:  $p < 10^{-4}$ ; 49 neurons in 5 mice.  
 401 Traces and data points represent mean  $\pm$  SEM (shading or error bars, respectively).



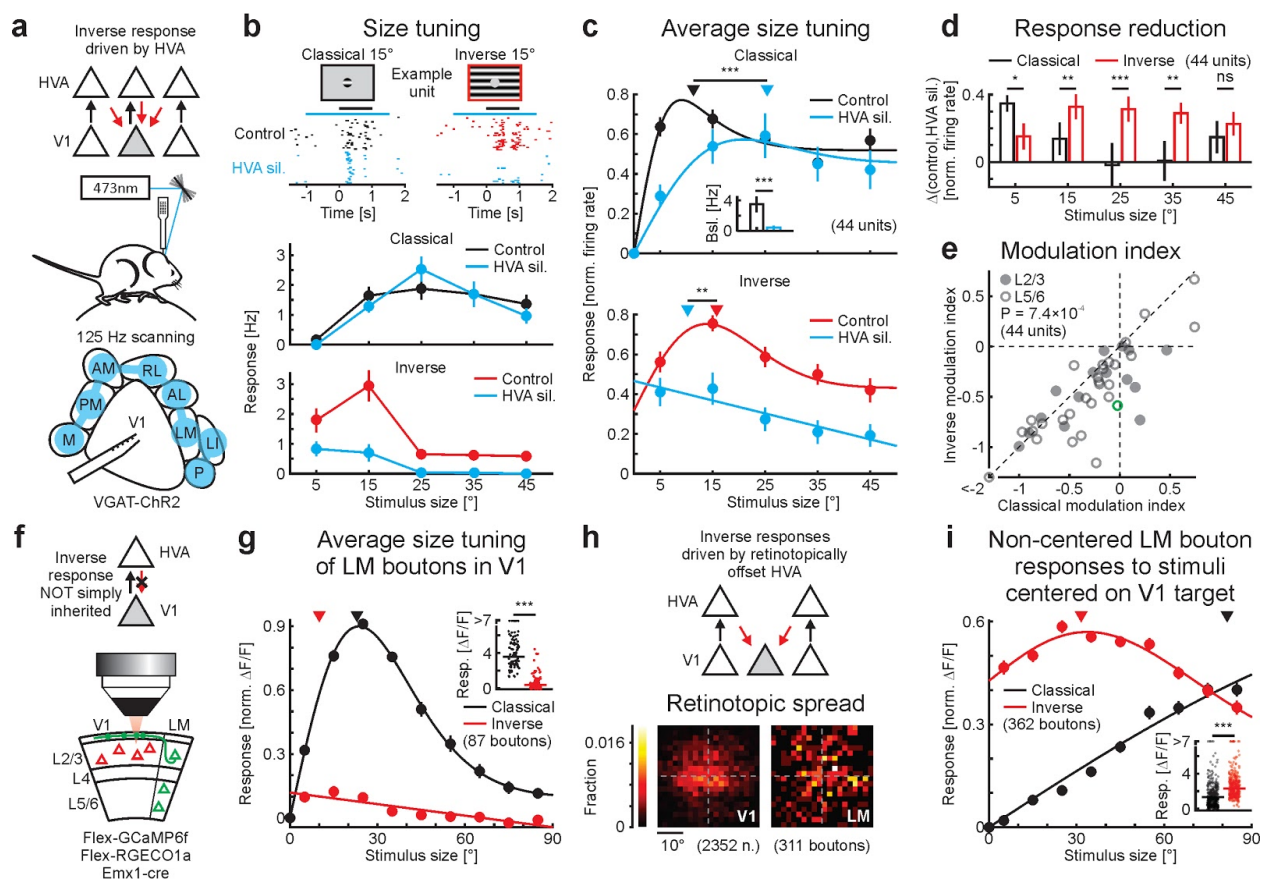

402

403 **Figure 5 | Higher visual areas contribute to inverse tuning in V1** **a**, Schematic of results and experimental  
 404 configuration. A laser beam is scanned over higher visual areas (HVAs) around V1 for optogenetic silencing while  
 405 recording in V1. **b**, Top: Raster plot of an example unit in layer 5/6 in response to classical and inverse stimuli of 15°  
 406 under control conditions and during silencing of HVAs (HVA sil.; blue; 30 trials each). Black and blue horizontal  
 407 lines are periods of stimulus presentation and HVA silencing, respectively. Bottom: Size tuning function of an example  
 408 unit (baseline subtracted firing rates) to classical and inverse stimuli and during silencing of HVAs (blue). Note the  
 409 stronger reduction in response to inverse stimuli upon silencing HVAs. **c**, Population-averaged size tuning function to  
 410 classical (top) and inverse (bottom) stimuli in control and during optogenetic silencing of HVAs (blue). For every  
 411 unit, baseline subtracted size tuning functions are normalized by their maximum control response to classical (top) or  
 412 inverse stimuli (bottom). Solid lines are fits to the data (see Methods). Triangles indicate median preferred size for  
 413 each condition. Wilcoxon signed-rank test; classical, \*\*\*:  $p = 3.2 \times 10^{-4}$ ; inverse, \*\*:  $p = 3.0 \times 10^{-3}$ ; 44 units in 12  
 414 mice. Inset: Mean baseline firing rate under control conditions and during silencing of HVAs (blue). Wilcoxon rank-  
 415 sum test; \*\*\*:  $p < 10^{-9}$ ; 44 units in 12 mice. **d**, Difference in firing rates (baseline subtracted and normalized) between  
 416 control conditions and HVA silencing for classical and inverse stimuli for the different sizes tested. Wilcoxon signed-  
 417 rank test; 5°, \*:  $p = 8.0 \times 10^{-3}$ ; 15°, \*\*:  $p = 1.4 \times 10^{-3}$ ; 25°, \*\*\*:  $p < 10^{-4}$ ; 35°, \*\*:  $p = 3.5 \times 10^{-3}$ ; 45°, ns:  $p = 0.70$ ; 44  
 418 units in 12 mice. **e**, Scatter plot of the modulation indexes of HVAs silencing for responses to classical and inverse  
 419 stimuli (see Methods). Closed and open symbols are units from layer 2/3 and 5/6, respectively. Green symbol  
 420 represents the example neuron shown in (b). Wilcoxon signed-rank test;  $p = 7.4 \times 10^{-4}$ ; 44 units in 12 mice. **f**,  
 421 Schematic of results and experimental configuration. **g**, Population-averaged size tuning function for classical and  
 422 inverse stimuli of LM boutons that are retinotopically aligned with their V1 target (see Methods). Note that these LM  
 423 boutons only weakly respond to inverse stimuli. Solid lines are fits to the data (see Methods). Triangles are median  
 424 preferred size. Insets: Maximum responses. Horizontal lines, medians. Wilcoxon signed-rank test; \*\*\*:  $p < 10^{-10}$ ; 87  
 425 boutons in 5 mice. **h**, Top: Schematic of results. Bottom: Retinotopic spread of the fFRF of V1 neurons and LM

426 boutons (2352 neurons and 311 boutons in the same 5 mice). **i**, Population-averaged size tuning function of LM  
427 boutons (375 boutons in 5 mice) that are NOT retinotopically aligned with their V1 target and have at least one  
428 significant response to any inverse stimuli. Note that both classical and inverse stimuli were presented at the fRF  
429 location of their putative V1 targets (see Methods) and NOT at the fRF location of the imaged LM boutons. Solid  
430 lines are fits to the data (see Methods). Triangles are median preferred size. Insets: Maximum responses. Horizontal  
431 lines, medians. Data points and bars represent mean  $\pm$  SEM.

## 432 **Methods**

433 **Animals.** All experimental procedures were conducted in accordance with the regulation of the Institutional  
434 Animal Care and Use Committee of the University of California, San Francisco. Mice of either sex were  
435 kept on a C57BL/6 background (except VIP-IRES-cre) and were of the following genotype:

436 Gad2-IRES-cre ( $GAD2^{tm2(cre)Zjh}$ ; JAX:010802)  $\times$  Ai14 ( $Gt(ROSA)26Sor^{tm14(CAG-tdTomato)Hze}$ ; JAX:007914)  
437 for imaging of layer 2/3 excitatory neurons (9 mice; Fig. 1a-c and 4, Extended Data Fig. 1, 3, and 4); Emx1-  
438 IRES-cre ( $Emx1^{tm1(cre)Kvj}$ ; JAX:005628) for imaging layer 2/3 excitatory neurons and axons from LM (5  
439 mice; Fig. 5f-i, and Extended Data Fig. 10a-h); Gad2-IRES-cre ( $GAD2^{tm2(cre)Zjh}$ ; JAX:010802) for imaging  
440 layer 2/3 neurons and labelling inhibitory projections (8 mice; Extended Data Fig. 6, 7h-k, and 10i-k); PV-  
441 cre ( $Pvalb^{tm1(cre)Arbr}$ ; JAX:017320)  $\times$  Ai14 ( $Gt(ROSA)26Sor^{tm14(CAG-tdTomato)Hze}$ ; JAX:007914) for imaging of  
442 layer 2/3 parvalbumin-expressing inhibitory neurons (PV; 7 mice; Fig. 2b); VIP-IRES-cre ( $Vip^{tm1(cre)Zjh}$ ;  
443 JAX: 010908)  $\times$  Ai14 ( $Gt(ROSA)26Sor^{tm14(CAG-tdTomato)Hze}$ ; JAX:007914) for imaging of layer 2/3  
444 vasoactive-intestinal-peptide-expressing inhibitory neurons (VIP; 8 mice; Fig. 2c); Sst-IRES-cre  
445 ( $Sst^{tm2.1(cre)Zjh}$ ; JAX:028864)  $\times$  Ai14 ( $Gt(ROSA)26Sor^{tm14(CAG-tdTomato)Hze}$ ; JAX:007914) for imaging of layer  
446 2/3 somatostatin-expressing inhibitory neurons (SOM; 5 mice; Fig. 2d); Scnn1a-Tg3-cre ( $Tg(Scnn1a-$   
447  $cre)3Aibs/J$ ; JAX:009613) and Scnn1a-Tg3-cre ( $Tg(Scnn1a-cre)3Aibs/J$ ; JAX:009613)  $\times$  Ai148  
448 ( $Igs7^{tm148.1(tetO-GCaMP6f,CAG-tTA2)Hze}$ ; JAX:030328) for imaging layer 4 excitatory neurons (5 mice and 1 mouse,  
449 respectively; Fig. 1d-f, and Extended Data Fig. 4d); and VGAT-ChR2-EYFP ( $Tg(Slc32a1-$   
450  $COP4*H134R/EYFP)8Gfng/J$ ; JAX:014548) for electrophysiology and optogenetic inhibition experiments  
451 (20 mice; Fig. 3 and 5a-e, Extended Data Fig. 5, 7a-g, 8, and 9). The mice were housed on a reverse light  
452 cycle (light/dark cycle: 12/12 hrs). At the start of the experiments, all mice were older than 2 months.

453 **Viruses.** We injected the following viruses: AAV2/1.ef1a.GCaMP6f.WPRE (FMI Vector Core Facility),  
454 AAV2/1.ef1a.DIO.GCaMP6f.WPRE (FMI Vector Core Facility), AAV2/1.CAG.CGCaMP6f (Janelia  
455 Vector Core), AAV2/9.syn.GCaMP7f (Addgene), AAV1.Syn.Flex.NES-jRGECO1a.WPRE.SV40  
456 (Addgene) and AAVretro.CAG.Flex.tdTomato (Addgene). Viruses were diluted to use titers of  
457 approximately  $5 \times 10^{12}$  genome copies/ml and 50nl were injected at each injection site (3 to 5 for two-  
458 photon and 1 for anatomy experiments) and each depth (2 from 350 to 200  $\mu$ m below the pial surface for  
459 two-photon calcium imaging experiments; 4 from 650 to 200  $\mu$ m below the pial surface for the anatomy  
460 experiments and two-photon recordings of LM boutons).

461 **Surgery.** Mice were anesthetized with 2% isoflurane or with a mixture of Fentanyl (West-Ward  
462 Pharmaceuticals, 0.05 mg/kg), Midazolam (Akorn, 5.0 mg/kg) and Dexmedetomidine (Zoetis, 0.5 mg/kg),  
463 injected subcutaneously. Mice's body temperature was monitored and kept constant. To prevent the eyes

464 from drying, a layer of lubricant ointment (Rugby) was applied. The skin above the skull was disinfected  
465 with povidone iodine. For mice prepared for intrinsic optical imaging (those needed for two-photon calcium  
466 imaging in higher visual areas (HVAs) or in LM boutons, and for all electrophysiology experiments), the  
467 bone over the right visual cortex was thinned, the exposed skull was covered with a thin layer of glue (krazy  
468 glue) and a headplate was attached using dental cement (Ortho-Jet Powder, Lang). The mice were then  
469 allowed to recover for several days before any other surgical or experimental procedures. For two-photon  
470 experiments, a craniotomy was made over the right visual cortex (3 to 4.5 mm in diameter) and viruses  
471 were injected with a micropump (UMP-3, World Precision Instruments) at a rate of 2 nl/s. The craniotomy  
472 was then sealed with a glass coverslip using cyanoacrylate glue and, if not already present, a headplate was  
473 attached. For electrophysiology experiments, a small craniotomy was performed (approximately 0.3 mm in  
474 diameter) guided by the activity maps of the visual cortex obtained by intrinsic optical imaging. After the  
475 recording, the mouse was either perfused for histology or its skull was protected with Kwik-Cast (World  
476 Precision Instruments) for the next experiment. For anatomical experiments, the skin was sutured after the  
477 viral injection using 6-0 suture silk (Fisher Scientific NC9134710). To reverse the anesthesia induced by  
478 the Fentanyl-Midazolam-Dexmedetomidine mixture, a mixture of Naloxone (Hospira, 1.2 mg/kg),  
479 Flumazenil (West-Ward Pharmaceuticals, 0.5 mg/kg), and Atipamezol (Zoetis, 2.5 mg/kg) was injected  
480 subcutaneously after the surgical procedures.

481 **Visual stimulation.** Visual stimuli were generated using the open-source Psychophysics Toolbox based on  
482 Matlab (MathWorks). Stimuli were presented at a distance of 15 cm to the left eye on a gamma-corrected  
483 LED-backlit LCD monitor (DELL) with a mean luminance of 20 cd/m<sup>2</sup>. For two-photon experiments using  
484 a resonant scanner, the power source of the monitor's LED backlight was synchronized to the resonant  
485 scanner turnaround points (when data were not acquired) to minimize light leak from the monitor<sup>42</sup>. We  
486 presented drifting sinusoidal gratings (2 Hz, 0.04 cycles/°, 100% contrast) unless stated otherwise. The trial  
487 structure of all stimulus sessions (receptive field mapping, size tuning, ...) was block randomized (the block  
488 size was given by the total number of parameter combinations). In all raster plots (Fig. 3, Fig. 5, and  
489 Extended Data Fig. 7), we separated stimulus conditions for clarity.

490 *Intrinsic imaging:* To estimate the visual area locations and their retinotopic maps using intrinsic imaging,  
491 we presented a narrow white bar (5°) on a black background, slowly drifting (10°/s) in one of the cardinal  
492 directions (10 to 20 trials per direction). In addition, we presented 25° patches of gratings at different  
493 retinotopic locations (usually one nasal and one temporal, 20 trials each). Gratings were presented for 2 s  
494 at 8 different directions (0.25 s each) followed by 13 s of gray screen.

495 *Receptive field mapping:* Stimuli consisted of either a 20° circular grating patch on a gray screen (classical  
496 stimulus) or a 20° gray circular patch on a full-field grating (i.e. large gratings covering the entire screen,  
497 approximately 120 × 90°; inverse stimulus) with a 15° spacing between the center of the patches (regular  
498 grid). For two-photon calcium imaging experiments, stimuli were presented for 1 s at a single direction or  
499 for 2 s at the four cardinal directions (0.5 s each). Stimulation periods were interleaved by 2 s of gray screen.  
500 We recorded 5 to 10 trials per stimulus condition. For electrophysiological experiments, stimuli were  
501 presented for 0.5 s at a single direction interleaved by 1 s of gray screen. We recorded 20 trials per stimulus  
502 condition. In addition, we used a finer grid of grating patches in a subset of experiments (patches of 10°  
503 with a spacing of 5°; Extended Data Fig. 4a, b).

504 *Orientation tuning:* We presented gratings of at least 15° diameter drifting in 8 directions (5 to 10 trials and  
505 20 trials per direction for two-photon calcium imaging and electrophysiology experiments, respectively).  
506 For Extended Data Fig. 3, we additionally presented inverse gratings drifting in 8 directions, centered on  
507 the classical feedforward receptive field (ffRF). Stimulus presentation time was 1 s interleaved with 1.5 to  
508 2 s of gray screen.

509 *Size tuning:* Patches of gratings and inverse gratings were displayed at 9 different sizes, equally spaced  
510 from 5 to 85° in diameter (10 trials per size; for two-photon experiments) or at 5 different sizes, equally  
511 spaced from 5 to 45° in diameter (20 to 30 trials per size; for electrophysiology experiments), centered on  
512 the ffRF. Stimulation time was either 2 s interleaved by 4 s of gray screen (for two-photon experiments) or  
513 1 s interleaved by 1.5 s of gray screen (for electrophysiology experiments). Trials with optogenetic  
514 stimulation had an additional 1 s pre-stimulus and 0.5 s post-stimulus gray screen during which the  
515 optogenetic light source was turned on and the total number of trials was doubled (**Optogenetics** below).  
516 In addition, we blurred the edge of the patches using a sigmoid function rising from 1% to 99% over 10° in  
517 a subset of experiments (Extended Data Fig. 1). All other parameters were the same as for the size tuning  
518 described above.

519 *Contrast tuning:* We simultaneously presented classical and inverse stimuli with several test contrasts (0,  
520 2<sup>-6</sup>, 2<sup>-5</sup>, ..., 1). Stimuli were presented for 2 s interleaved by 4 s of gray screen (10 trials per stimulus  
521 combination).

522 *Response dynamics:* To estimate the temporal response profile to inverse stimuli (Fig. 3), we presented  
523 patches of gratings and inverse gratings at a single size (1000 trials each). These gratings were presented  
524 either at 15° or 20°, for 0.5 s interleaved by 1 s of gray screen. The initial phase of the drifting gratings was  
525 randomized to avoid overestimating the onset delay of the response for simple-cell-like receptive fields.

526 **Behavioral monitoring.** All mice were habituated (3 to 5 days) to experimental rigs before starting  
527 experiments. During all awake experiments, we recorded the positions of the left eye using a CMOS camera  
528 (DMK23UM021, Imaging Source) with a 50 mm lens (M5018-MP, Moritex), tracked the running speed of  
529 the mouse, and monitored its general behavior using a webcam (LifeCam Cinema 720p HD, Microsoft).  
530 Excluding eye-movement or running trials did not affect the results. For experiments under anesthesia that  
531 followed awake experiments (Fig. 4 and Extended Data Fig. 6), mice were anesthetized with isoflurane  
532 (approximately 1% in O<sub>2</sub>) delivered with a nose cone. After induction of anesthesia, mice's body  
533 temperature was monitored and kept constant. To ensure an adequate depth of anesthesia, we tracked the  
534 left eye and monitored general behavior.

535 **Intrinsic optical imaging.** We used intrinsic optical imaging to identify the center of primary visual cortex  
536 (V1) or the locations of HVAs. We sedated the mice with chlorprothixene (0.7 mg/kg) then lightly  
537 anesthetized with isoflurane (0.5 to 1% in O<sub>2</sub>) delivered through a nose cone. The rectal temperature was  
538 monitored and maintained at 37°C. We illuminated visual cortex with 625 nm light from two LED light  
539 sources (M625F2, Thorlabs) using 1.5 mm light fibers (FP1500URT, Thorlabs). The intrinsic optical signal  
540 was measured with an Olympus MVX stereo-microscope using a narrow bandpass filter (700/13 nm  
541 BrightLine, Semrock). We acquired the images at 10 Hz with a CCD camera (Orca-Flash 4.0 v2,  
542 Hamamatsu) using custom-written software in LabVIEW (National Instruments).

543 **Two-photon calcium imaging.** Imaging was performed using either a galvanometric-scanner based MOM  
544 (Sutter) or a resonant-scanner based (8 kHz) Bergamo II two-photon microscope (Thorlabs), both controlled  
545 by ScanImage (Vidrio). Using the MOM system, we acquired images of 128 × 128 pixels at a single depth  
546 at 5.92 Hz frame rate. With the Bergamo II, we acquired images of 380 × 512 pixels at 1 or 4 depths at 40  
547 Hz or 8 Hz frame rate, respectively. We obtained similar results with both systems, so all data were pooled.  
548 The illumination light source was a Ti:sapphire laser (Chameleon Ultra II, Coherent) used at an excitation  
549 wavelength of 910 nm for green indicator imaging and of 1040 nm for red indicator imaging. The laser  
550 power under the objective (16×, Nikon) never exceeded 50 mW (laser pulse width 140 fs at a repetition rate  
551 of 80 MHz).

552 **Electrophysiology.** We performed extracellular recordings using multi-electrode silicon probes (A1x32-  
553 Edge-5mm-20-177-A32, NeuroNexus) with 32 channels spaced by 20 μm. The recording electrodes were  
554 controlled with micromanipulators (Luigs&Neumann) and coated with DiO lipophilic dyes (Life  
555 Technologies) for *post hoc* identification of the electrode track. We recorded the bandpass-filtered (0.1 Hz  
556 to 7.5 kHz) signals at 30 kHz using an Intan system (RHD2000 USB Interface Board, Intan Technologies).



557 **Optogenetics.** We used the VGAT-ChR2-EYFP mouse line to ensure a homogeneous expression of the  
558 opsin. To silence parts of visual cortex, we used a 473 nm laser (LuxX 473-80, Omicron-Laserage). The  
559 light was first guided through a pinhole to collimate the beam, then sent through a long-range focal lens  
560 (AC254-300-A, Thorlabs) to focus the light onto the cortical surface (theoretical spot size  $\leq 200 \mu\text{m}$ ), before  
561 it entered a 2D-galvo system (GVS202, Thorlabs) to direct the light to the regions of interest. The scanners  
562 were controlled by custom-written software in LabVIEW (National Instruments) and guided by a CMOS  
563 camera (DMK23UM021, Imaging Source) with a 50 mm lens (M5018-MP, Moritex). For Fig. 5a-e and  
564 Extended Data Fig. 7-9, we defined 8 HVAs (P, LI, LM, AL, RL, AM, PM, and M) based on the intrinsic  
565 optical imaging maps established before the optogenetic experiment (see **Data analysis**, *Intrinsic optical*  
566 *imaging maps*). These areas were consecutively scanned in a circular manner with a dwell time of  $\leq 1$  ms  
567 per area (resulting in 125 Hz frequency for the whole cycle). The laser was briefly shut off each time the  
568 beam moved from area M and P to avoid silencing parts of V1 (see **Visual Stimulation** for timing within  
569 a trial). For assessing the role of single HVAs in the generation of inverse tuning, we targeted each area  
570 individually (Extended Data Fig. 9). To verify the effectiveness of the silencing using this approach, we  
571 performed control recordings by scanning over the recording site in V1 (Extended Data Fig. 7a-c). To  
572 measure the spatial extent of silencing, we parked the laser at 5 locations at and around the recording site  
573 (800  $\mu\text{m}$  and 400  $\mu\text{m}$  lateral and medial of the recording site and on the recording site itself, randomizing  
574 which location to silence for each trial), targeted individual HVAs, or scanned over these 8 HVAs (Extended  
575 Data Fig. 7d-g). For experiments scanning over all 8 HVAs, the laser power was set to approximately 0.75  
576  $\text{mW}/\text{mm}^2$  (total power at the surface of cortex was 3 mW distributed over approximately 4  $\text{mm}^2$  of  
577 illuminated HVAs). For experiments targeting individual locations or HVAs, the laser power was set to  
578 approximately 4  $\text{mW}/\text{mm}^2$  (total power at the surface of cortex: 2 mW).

579 **Histology.** Mice were deeply anesthetized with 5% isoflurane and urethane, and transcardially perfused  
580 with PBS followed by 4% paraformaldehyde in PBS. The brain was then embedded in 2 to 3% agar and  
581 100  $\mu\text{m}$  thick sections were cut using a microtome (Leica VT1000 S vibratome). Slices were mounted using  
582 a Vectashield HardSet mounting medium containing DAPI (H-1500-10, Vector Laboratories H1500).  
583 Images were acquired with an Olympus MVX10 MacroView microscope or a Nikon Ti CSU-W1 inverted  
584 spinning disk confocal microscope.

585 For electrophysiology experiments, the penetration depth was estimated *post hoc* using the DiO track of the  
586 electrode (see **Electrophysiology**) and the layer 4/layer 5 border was defined based on the DAPI staining.  
587 This allowed us to determine which pins of the electrode were located in layer 5/6. For scatter plots, inverse-  
588 tuned units (see **Data analysis**) were defined as layer 2/3 or layer 5/6 units if they were above or below this  
589 border, respectively.

590 To identify and quantify inhibitory long-range projections from HVAs to V1 (Extended Data Fig. 7h-1), we  
591 injected an AAVretro.CAG.Flex.tdTomato in V1 of GADcre mice and waited approximately 3 weeks  
592 before sacrificing the mice. The borders between V1 and the HVAs were defined based on the DAPI  
593 staining using the thickness of layer 4. Based on these borders and a mouse atlas<sup>43</sup>, we defined the location  
594 and identity of HVAs. To quantify the number of inhibitory neurons in HVAs projecting to V1, we counted  
595 the tdTomato-positive cell bodies in the coronal slice that contained the center of the area. Note that this  
596 underestimates the difference in the number of projection neurons between V1 and HVAs.

597 **Data analysis.** All data were analyzed using custom-written code in Matlab (MathWorks).

598 *Two-photon calcium imaging:* We analyzed two-photon calcium imaging data as described previously<sup>44</sup>.  
599 Briefly, data were full-frame registered using custom-written software ([https://sourceforge.net/projects/iris-](https://sourceforge.net/projects/iris-scanning/)  
600 [scanning/](https://sourceforge.net/projects/iris-scanning/)). We selected the neurons semi-manually, based on mean and maximum projection images. We  
601 calculated the raw fluorescence traces as the average fluorescence of all pixels within a selected region of  
602 interest for each frame. Fluorescence changes ( $\Delta F/F$ ) were calculated as described elsewhere<sup>45</sup>. All stimulus  
603 evoked responses were baseline subtracted (1 s pre-stimulus interval).

604 *Extracellular recordings:* We determined single unit firing using KiloSort and Phy  
605 (<https://github.com/cortex-lab/KiloSort>). We determined the spike times with 1 ms resolution. Inhibitory  
606 units were defined as units that significantly increased their firing rate during optogenetic stimulation in the  
607 absence of a visual stimulus, i.e. during the pre-visual-stimulus baseline. All stimulus evoked responses  
608 were baseline subtracted (0.5 s pre-stimulus interval).

609 *Response amplitude:* The response amplitude to a stimulus was computed as the average response over the  
610 duration of the stimulus presentation (excluding the first 0.5 s of each trial for two-photon experiments due  
611 to the delay and slow rise of calcium indicators). Responses were normalized by the maximum response  
612 over the relevant stimulus parameter space and then averaged over neurons or units. We defined significant  
613 responses as responses that exceeded a z-score of 3.29 (corresponding to  $p < 10^{-3}$ ) or 5.33 (corresponding  
614 to  $p < 10^{-7}$ ; for two-photon experiments in layer 4).

615 *Receptive field mapping:* To estimate the center of the receptive field, we fitted the responses to patches of  
616 gratings with a two-dimensional Gaussian. We excluded neurons if they failed to have at least one  
617 significant trial-averaged response within  $10^\circ$  of their estimated centers (or the closest data point if no  
618 stimulus was located within  $10^\circ$ ). For the comparison of the average receptive field maps to classical and  
619 inverse stimuli (Fig. 1 and 2, Extended Data Fig. 4 and 5), we only included neurons with at least one  
620 significant average response to a classical and an inverse stimulus at any location. To compare regular and

621 fine receptive field mapping (Extended Data Fig. 4), neurons were only included if they responded to both  
622 fine and regular grid stimuli and if their estimated receptive field center (of the regular grid) was within the  
623 surface covered by the fine mapping stimuli (see smaller dashed rectangle in Extended Data Fig. 4a). To  
624 illustrate the average receptive fields (heat maps in Fig. 1, Extended Data Fig. 4 and 5), we used a spline  
625 interpolation and smoothed the overall average with a two-dimensional Gaussian filter ( $10^\circ$ ). We excluded  
626 neurons from further analysis (e.g. size tuning, ...) if the estimated centers of their ffRFs were not within  
627  $10^\circ$  of the centers of the stimuli presented to establish size tuning, orientation tuning, (...).

628 *Size tuning:* We fitted the data to an integral over a difference of Gaussians. This fit was used to estimate  
629 the neurons' ffRF and feedback receptive field (fbRF) sizes. We approximated the ffRF size by the size of  
630 the patch of gratings evoking the largest response (size tuning fits were bound to the interval  $0.1$  to  $90.1^\circ$ ).  
631 Note that we excluded neurons from further analysis if they failed to respond to at least one classical  
632 stimulus of any size. To compare size tuning with sharp and blurred edges, neurons had to respond to at  
633 least one classical stimulus of any size for both stimulus types (sharp and blurred; Extended Data Fig. 1).  
634 Surround suppressed neurons were defined as neurons in which the responses to any classical stimulus were  
635 significantly larger than those to the largest classical stimulus tested (Extended Data Fig. 5). We calculated  
636 the suppression index as the average response over the two largest stimuli presented divided by the  
637 maximum response (Extended Data Fig. 8c). The same sizes were used to calculate the suppression index  
638 during HVA silencing.

639 *Defining inverse-tuned neurons:* Neurons were defined as inverse tuned if they significantly responded to  
640 at least one classical and one inverse stimulus and if their response to at least one inverse stimulus of any  
641 size centered on their ffRF was significantly larger than that to a full-field stimulus (or approximated by  
642 the response to the largest classical or smallest inverse stimulus presented).

643 *Inverse tuning index (ITI):* We defined the inverse tuning index as:

$$644 \quad ITI = \frac{R_{inv} - R_{cla}}{2 \times ((R_{inv} - R_{ff}) + (R_{cla} - R_{ff}))} + 0.5$$

645 with  $R_{inv}$ : maximum response to inverse stimuli,  $R_{cla}$ : maximum response to classical stimuli, and  $R_{ff}$ :  
646 response to a full-field stimulus.

647 *Orientation tuning:* We fitted a circular sum of Gaussians with a peak offset of  $180^\circ$  and equal tuning width  
648 (full width at half maximum of the Gaussian fit). We calculated orientation selectivity index (OSI) and  
649 direction selectivity index (DSI) as described elsewhere<sup>12</sup>. Classical and inverse stimuli were presented at

650 a fixed stimulus diameter ( $10^\circ$ ,  $15^\circ$ , or  $20^\circ$ ). Neurons were excluded from this analysis (Extended Data Fig.  
651 3b-g) if their classical and inverse preferred sizes were not within  $10^\circ$  of the presented stimulus size.

652 *Contrast tuning:* Classical and inverse stimuli were presented at a fixed stimulus diameter ( $10^\circ$ ,  $15^\circ$ , or  $20^\circ$ )  
653 and at one orientation. Neurons were excluded from this analysis (Extended Data Fig. 3h) if their classical  
654 and inverse preferred sizes were not within  $10^\circ$  of the presented stimulus size. Moreover, we excluded  
655 neurons if their OSIs were above and  $\geq 0.3$  AND if their orientation preference was not within  $45^\circ$  of the  
656 presented stimulus orientation. In other words, we excluded neurons that were strongly orientation tuned to  
657 the orthogonal orientation.

658 *Response dynamics:* To estimate the response delay, rise time, and onset slope for classical and inverse  
659 stimuli, we binned the spike times in bins of 10 ms and then median filtered (50 ms) the average traces. We  
660 defined the response delay as the first data point after stimulus onset that crossed a z-score threshold of 5.33  
661 (corresponding to  $p < 10^{-7}$ ). Further, we defined the rise time as the interval between the response onset (as  
662 estimated for the response delay) and the first time point crossing 75% of the maximum response during  
663 stimulus presentation (changing this arbitrary value to 50% or 100% did not affect the results). Finally, we  
664 estimated the response onset slope as the fitted slope to the response during the initial rise time. We  
665 excluded units whose responses did not exceed the response threshold defined above. Furthermore, for the  
666 population responding to the classical stimulus (Fig. 3g), units were excluded if their preferred classical  
667 size was larger than the presented stimulus size ( $\pm 10^\circ$ ). For the inverse-tuned population (Fig. 3g), units  
668 were excluded if their preferred inverse size was smaller than the presented size ( $\pm 10^\circ$ ). For the inverse-  
669 tuned subpopulation of units responding to both (Fig. 3c-f), both classical and inverse sizes were required  
670 to be within  $10^\circ$  of the presented stimulus size.

671 *Awake/anesthetized:* Neurons were included in this analysis based on their awake responses (Fig. 4 and  
672 Extended Data Fig. 6). However, to ensure that the stimuli were also centered on the receptive fields under  
673 anesthesia, neurons were excluded if the estimated centers of their fRFs under anesthesia were not within  
674  $10^\circ$  of the centers of the anesthetized size tuning stimuli presented. To estimate the peak response of a  
675 neuron under anesthesia, we used the same size as in the awake condition ( $\pm 10^\circ$ ).

676 *Size tuning of (non-centered) LM boutons to stimuli centered on their putative V1 targets:* Size tuning  
677 stimuli were presented at a location such that the population-averaged center of the V1 receptive fields was  
678 within  $10^\circ$  (Extended Data Fig. 10f, left). LM boutons were excluded from this analysis if their estimated  
679 centers of their fRFs were within  $10^\circ$  of the centers of the presented size stimuli (Extended Data Fig. 10h).  
680 Hence, only putative offset boutons were included. Additionally, for Fig. 5i, boutons needed to respond to  
681 an inverse stimulus of any size (stimulus was NOT centered on the boutons' receptive fields).

682 *Intrinsic optical imaging maps:* We calculated the temporal phase of the Fourier component at the  
683 frequency of the bar presentation. This gave us the complete extent of V1. For locating HVAs, we cross  
684 checked the Fourier maps with those obtained from the responses to patches of gratings at different  
685 retinotopic locations and confirmed them by standard maps in the literature<sup>46</sup>.

686 *Modulation index:* We calculated the modulation indexes as the difference between the activity during the  
687 optogenetic and the control condition divided by the sum of the two.

688 **Statistics.** We used Wilcoxon rank-sum tests for independent group comparisons, Wilcoxon signed-rank  
689 tests for paired tests and Student's t-tests for a single group analysis. No statistical methods were used to  
690 pre-determine sample sizes, but our sample sizes were similar to those used in previous publications.

691 **Data availability.** Datasets supporting the findings of this paper are available on request from the  
692 corresponding authors.

693 **Code availability.** Custom code is available from the corresponding authors on request.

#### 694 **Methods-only references**

- 695 42. Leinweber, M. *et al.* Two-photon calcium imaging in mice navigating a virtual reality  
696 environment. *J. Vis. Exp.* **84**, (2014).
- 697 43. Paxinos, G. & Franklin, K. B. J. The Mouse Brain in Stereotaxic Coordinates. *Acad. Press* **4th**  
698 **Ed.**, (2012).
- 699 44. Keller, A. J. *et al.* Stimulus relevance modulates contrast adaptation in visual cortex. *Elife* (2017).  
700 doi:10.7554/eLife.21589
- 701 45. Dombeck, D. A., Khabbaz, A. N., Collman, F., Adelman, T. L. & Tank, D. W. Imaging Large-  
702 Scale Neural Activity with Cellular Resolution in Awake, Mobile Mice. *Neuron* **56**, 43–57 (2007).
- 703 46. Garrett, M. E., Nauhaus, I., Marshel, J. H. & Callaway, E. M. Topography and Areal Organization  
704 of Mouse Visual Cortex. *J. Neurosci.* **34**, 12587–12600 (2014).

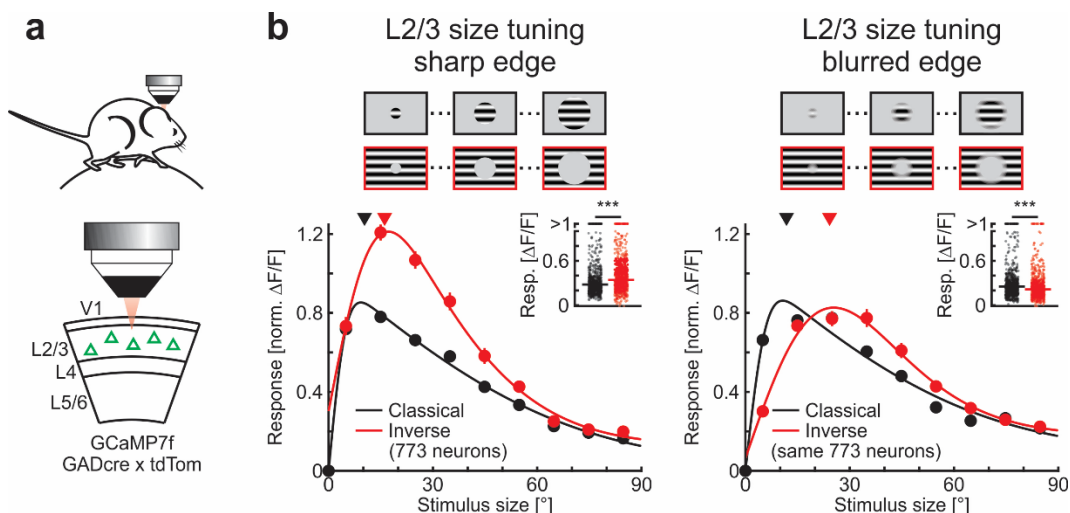

705

706 **Extended Data Figure 1 | Robust responses to inverse stimuli with blurred edges.** **a**, Experimental  
 707 configuration. **b**, Top: Schematic of stimuli used for size tuning functions. Bottom: Population-averaged size tuning  
 708 of classical and inverse stimuli with sharp edges (left) and stimuli with blurred edges (right; see Methods). Here and  
 709 in all other figures, black and red traces are responses to classical and inverse stimuli, respectively, and shaded areas  
 710 are periods of stimulus presentation. Solid lines are fits to the data (see Methods). Triangles above size tuning functions  
 711 indicate median preferred size for each condition. Insets: Maximum responses. Horizontal lines, medians. Wilcoxon  
 712 signed-rank test; sharp edge, \*\*\*:  $p < 10^{-8}$ ; blurred edge, \*\*\*:  $p < 10^{-9}$ ; 773 neurons in 4 mice. Traces and data points  
 713 represent mean  $\pm$  SEM (shading or error bars, respectively). Here and in all other figures, error bars are present but  
 714 sometimes smaller than symbols.



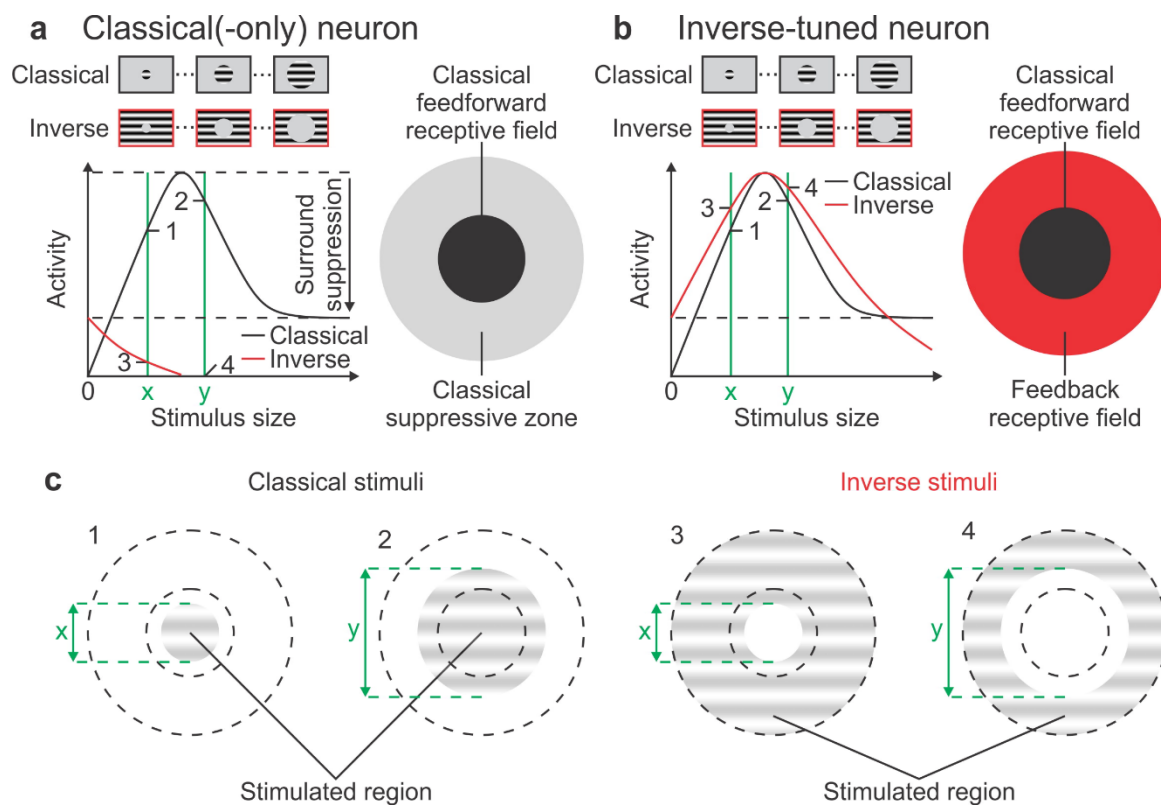

715

716 **Extended Data Figure 2 | Illustration of classical and inverse-tuned neurons.** **a**, Classical(-only) neuron. Left: The  
 717 response of a neuron probed with classical stimuli (black) increases with the size of the stimulus until it peaks at the  
 718 neuron's preferred size (top horizontal dotted line). The response then decreases due to surround suppression  
 719 (maximum suppressed level indicated by the lower dotted horizontal line). The response of the same neuron probed  
 720 with inverse stimuli (red) starts at the maximally surround suppressed activity level (an inverse stimulus with a size  
 721 of  $0^\circ$  is a full-field grating) and then decreases as the diameter of the gray patch increases, consistent with visual  
 722 stimulation being progressively removed from the classical feedforward receptive field (ffRF). Right: Schematic of a  
 723 neuron's ffRF surrounded by its classical suppressive zone. **b**, Inverse-tuned neuron. Left: The response of the neuron  
 724 probed with inverse stimuli (red) starts, as for the classical-only neuron, at the maximally surround suppressed activity  
 725 level but then it increases until reaching the neuron's preferred inverse stimulus size and decreases with larger  
 726 diameters of the gray patch consistent with visual stimulation being progressively removed from the feedback  
 727 receptive field (fbRF). Right: Schematic of a neuron's ffRF surrounded by its fbRF. **c**, Four example stimuli: Two  
 728 classical stimuli (1 and 2 of sizes  $x$  and  $y$ , respectively) and two inverse stimuli (3 and 4, also of sizes  $x$  and  $y$ ,  
 729 respectively). The inner dotted circle represents the outer border of the classical ffRF. The outer dotted circle  
 730 represents the outer border of the suppressive region and, for inverse-tuned neurons, also the outer border of the  
 731 fbRF. The response amplitudes to the four example stimuli (1 to 4) in a classical-only neuron and in an inverse-tuned  
 732 neuron, are marked in (a) and (b), respectively, at the intersection between the green vertical lines (stimulus size) and  
 733 the size tuning curves.

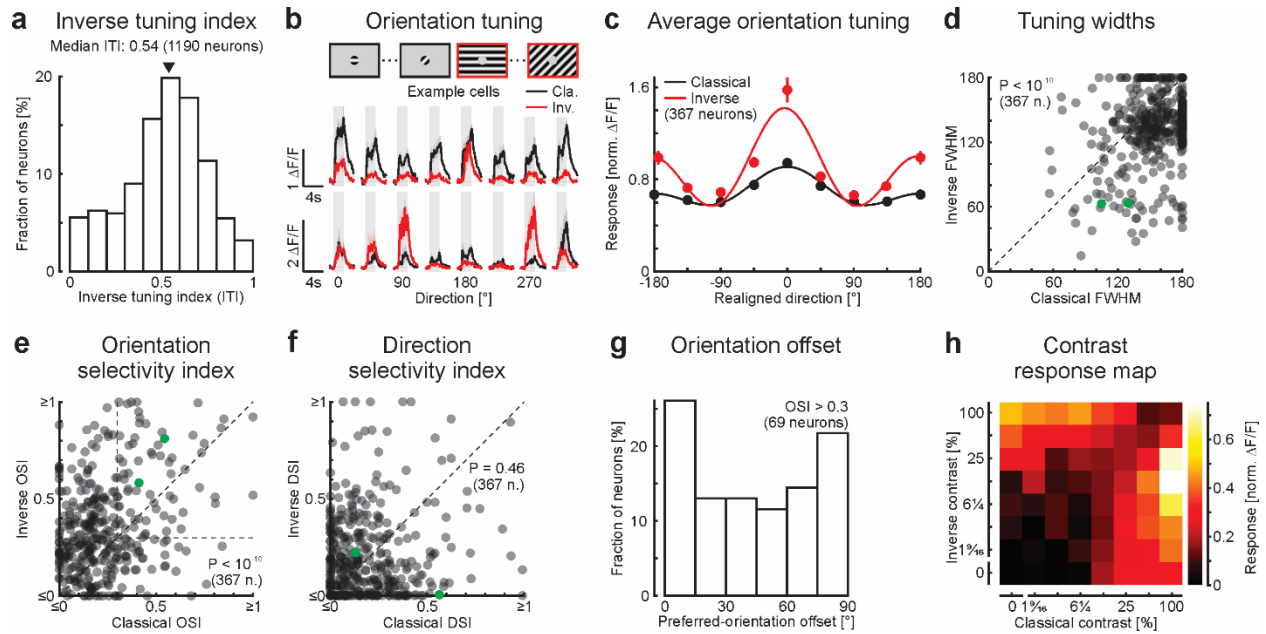

734

735 **Extended Data Figure 3 | Classical and inverse tuning properties in layer 2/3 excitatory neurons.** **a**, Distribution  
 736 of inverse tuning indices (ITIs) of layer 2/3 excitatory neurons (0: classical only; 0.5 equal peak response to classical  
 737 and inverse stimuli; 1: inverse only; see Methods). Triangle above the distribution indicates median. Same neurons as  
 738 in Fig. 1c; 1190 neurons in 9 mice. **b**, Top: Schematic of stimuli presented at different orientations to map the classical  
 739 and inverse orientation preferences. We tested 8 orientations at intervals of 45° at the neuron's preferred stimulus size  
 740 and location using either a classical or an inverse stimulus. Bottom: Calcium responses of two example neurons in  
 741 primary visual cortex (V1) for each orientation using classical and inverse stimuli. **c**, Population-averaged tuning  
 742 curve for classical and inverse stimuli. Each neuron's preferred orientations (independently for classical and inverse  
 743 stimuli) were aligned to 0° and its activity normalized to its maximum response (367 neurons in 4 mice). Solid lines  
 744 are fits to the data (see Methods). **d**, Tuning widths of orientation tuning curves obtained with classical stimuli  
 745 compared to those obtained with inverse stimuli. For each neuron, tuning width was defined as the full width at half  
 746 maximum (FWHM) of the fitted tuning curve. Wilcoxon signed-rank test;  $p < 10^{-10}$ ; 367 neurons in 4 mice. Green  
 747 symbols represent the example neurons shown in (b). **e**, Same for orientation selectivity indexes. The horizontal and  
 748 vertical lines at 0.3 delimit the orientation-selective population. Wilcoxon signed-rank test;  $p < 10^{-10}$ ; 367 neurons in  
 749 4 mice. **f**, Same for direction selectivity indexes. Wilcoxon signed-rank test;  $p = 0.46$ ; 367 neurons in 4 mice. **g**,  
 750 Distribution of orientation offsets. For orientation-selective neurons only (see (e), with both OSIs  $\geq 0.3$ ), an orientation  
 751 offset was computed, defined as the absolute difference in orientation between a neuron's preferred orientation for a  
 752 classical and an inverse stimulus. **h**, Contrast response map. Classical and inverse stimuli were presented  
 753 simultaneously, and different combinations of contrasts were tested. The contrast heat map was obtained by averaging  
 754 normalized activity (86 neurons in 4 mice). Traces and data points represent mean  $\pm$  SEM (shading or error bars,  
 755 respectively).

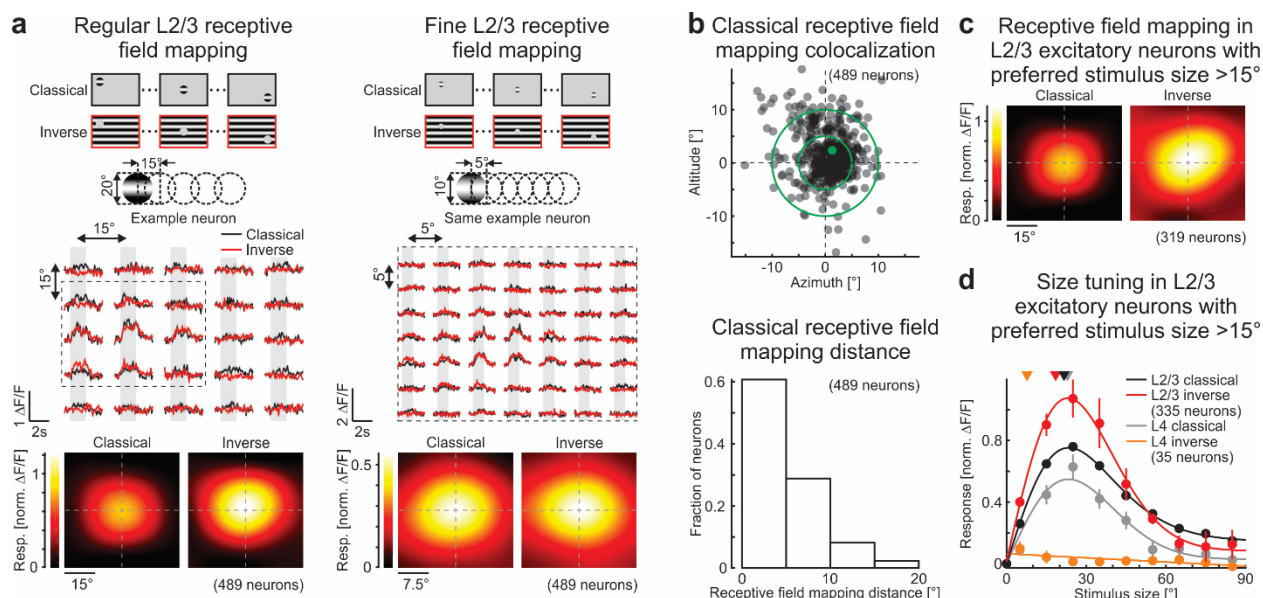

756  
 757 **Extended Data Figure 4 | Inverse tuning is not due to low mapping resolution.** **a**, Top left: Schematic of regular  
 758 receptive field mapping. Stimulus diameter of 20° with a grid spacing of 15°. Center left: Trial-averaged calcium  
 759 responses from an example neuron for each stimulus location. Bottom left: Population-averaged receptive field for  
 760 responses to classical or inverse stimuli aligned to the center of the fRF (489 neurons in 4 mice). Right: Same but  
 761 with fine receptive field mapping. Stimulus diameter of 10° with a grid spacing of 5° (only for part of the visual space  
 762 covered with the regular mapping, see dotted rectangle on the left). **b**, Top: Spatial offset of regular fRF mapping  
 763 compared to fine fRF mapping (same 489 neurons in 4 mice). For each neuron, its fRF center estimated by the fine  
 764 grid mapping is aligned at [0,0] and the localization of its estimated fRF center estimated by the regular grid is plotted  
 765 with respect to the fine grid estimated center. Bottom: Distribution of distances between the center of fRF estimated  
 766 by fine grid mapping and the center estimated by regular grid mapping (approximately 90% of neurons have a distance  
 767 between the two centers below 10°). Green symbol represents the example neuron shown in **(a)**. **c**, Population-  
 768 averaged receptive field for responses to classical or inverse stimuli aligned to the center of the fRF and only for layer  
 769 2/3 neurons that had a preferred fRF size of more than 15° (319 neurons in 9 mice). **d**, Population-averaged size  
 770 tuning curves for classical (black: layer 2/3 neurons with fRF > 15°, 335 neurons in 9 mice; gray: layer 4 neurons, 35  
 771 neurons in 6 mice) and inverse (red: layer 2/3 neurons with fRF > 15°, 335 neurons in 9 mice; orange: layer 4 neurons,  
 772 35 neurons in 6 mice) stimuli. Solid lines are fits to the data (see Methods). Triangles above size tuning functions  
 773 indicate median preferred size for each condition. Inset: Maximum responses. Horizontal lines, medians. Layer 2/3  
 774 neurons with fRF size > 15°; Wilcoxon signed-rank test; \*;  $p = 6.7 \times 10^{-3}$ ; 335 neurons in 9 mice. Traces and data  
 775 points represent mean  $\pm$  SEM (shading or error bars, respectively).

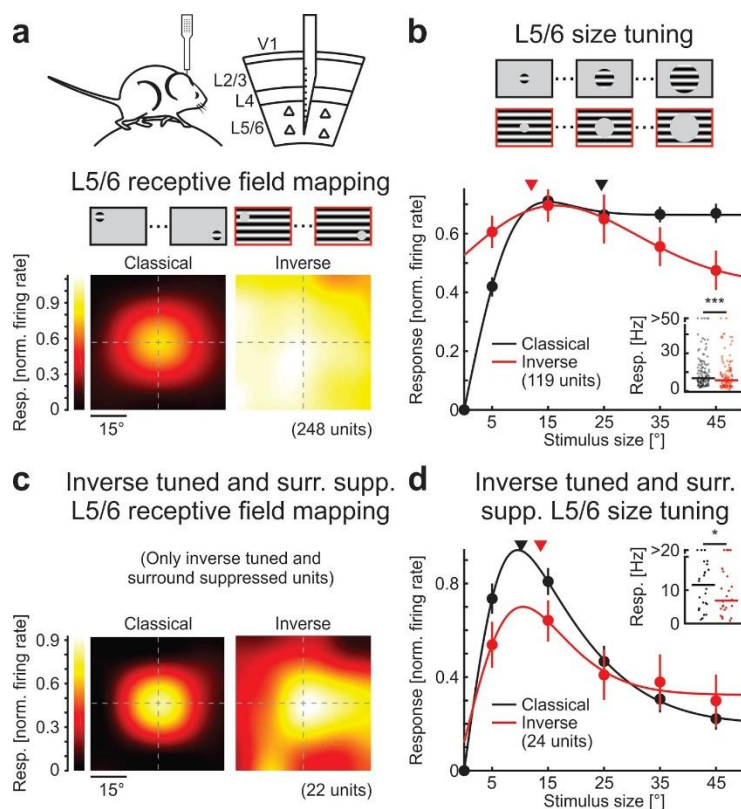

776

777 **Extended Data Figure 5 | Responses to inverse stimuli in layer 5/6.** **a**, Receptive field mapping of layer 5/6 neurons  
 778 using classical and inverse stimuli. Top: Experimental configuration. Electrophysiological recordings were obtained  
 779 in awake mice. The silicon probe spanned all layers, including deep layers (see Methods for layer definition). Center:  
 780 Receptive fields were mapped using classical and inverse stimuli. Bottom left: Population-averaged ffRFs for layer  
 781 5/6 neurons. Bottom right: Same for inverse stimuli, aligned relative to the center of the ffRF (248 units in 20 mice).  
 782 **b**, Size tuning of layer 5/6 neurons using classical and inverse stimuli. Top: Schematic of stimuli used for size tuning  
 783 functions. The classical and inverse stimuli were presented at the same location (within 10° of the estimated center of  
 784 the ffRF). Bottom, normalized size tuning curves for classical and inverse stimuli. Solid lines are fits to the data (see  
 785 Methods). Triangles above size tuning functions indicate median preferred size for each condition. Inset: Maximum  
 786 responses. Horizontal lines, medians. Wilcoxon signed-rank test; \*\*\*:  $p = 1.1 \times 10^{-4}$ ; 119 units in 20 mice. **c** and **d**,  
 787 same as **(a** and **b)** but for subset of layer 5/6 units defined both as surround suppressed and inverse tuned (as compared  
 788 to **(b)** where all layer 5/6 units that responded to at least one classical stimulus size were included; see Methods) **(c)**,  
 789 22 units in 12 mice; **(d)**, Wilcoxon signed-rank test; \*:  $p = 0.016$ ; 24 units in 12 mice. Data points represent mean  $\pm$   
 790 SEM (error bars).

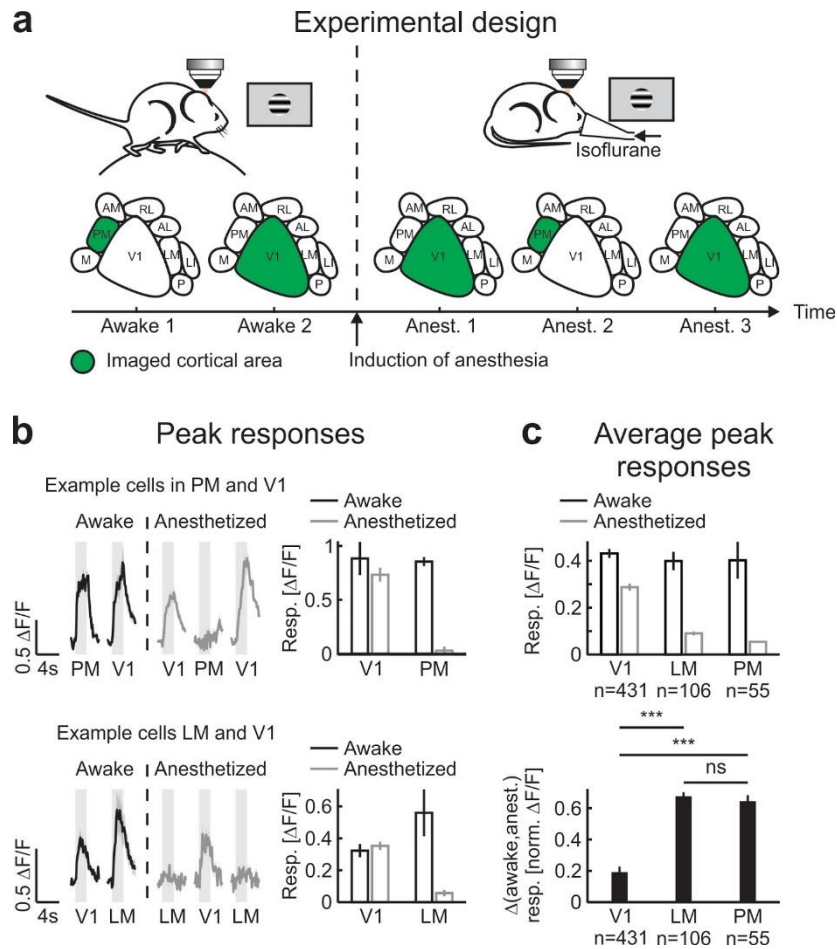

791

792 **Extended Data Figure 6 | Impact of anesthesia is more pronounced in higher visual areas.** **a**, Experimental design.  
 793 The responses to classical stimuli of neurons in a higher visual area (HVA), LM or PM, and V1 were recorded using  
 794 two-photon calcium imaging. The experiment started in awake mice by imaging either a HVA or V1. After induction  
 795 of anesthesia, the same neurons were imaged again. To reduce the influence of variability in anesthesia levels, the first  
 796 imaged area under anesthesia was imaged again at the end of the experiment. **b**, Peak responses in visual areas. Top  
 797 left: Example calcium response of a neuron located in PM and another neuron located in V1 in an awake mouse (black)  
 798 and responses of the same neurons in the anesthetized mouse (gray). Top right: Trial-averaged peak response for the  
 799 same neurons shown on the left for the awake (black) and anesthetized mouse (gray). Bottom, same for a different  
 800 mouse but recorded in V1 and LM. **c**, Population-averaged peak responses in awake and anesthetized mice. Top:  
 801 Population-averaged peak responses in V1, LM and PM for awake (black) and anesthetized mice (gray). Wilcoxon  
 802 signed-rank test; V1,  $p < 10^{-10}$ , 431 neurons in 5 mice; LM,  $p < 10^{-10}$ , 106 neurons in 3 mice; PM,  $p < 10^{-9}$ , 55 neurons  
 803 in 2 mice. Bottom: Population-averaged difference between normalized neuronal activity for awake and anesthetized  
 804 state. For each neuron, all responses were normalized by the peak activity in the awake state before computing the  
 805 differences. Wilcoxon rank-sum test; V1, 431 neurons in 5 mice; LM, 106 neurons in 3 mice; PM, 55 neurons in 2  
 806 mice. V1-LM, \*\*\*:  $p < 10^{-10}$ ; V1-PM, \*\*\*:  $p < 10^{-10}$ ; LM-PM, NS:  $p = 0.48$ . Traces and bars represent mean  $\pm$  SEM  
 807 (shading or error bars, respectively).



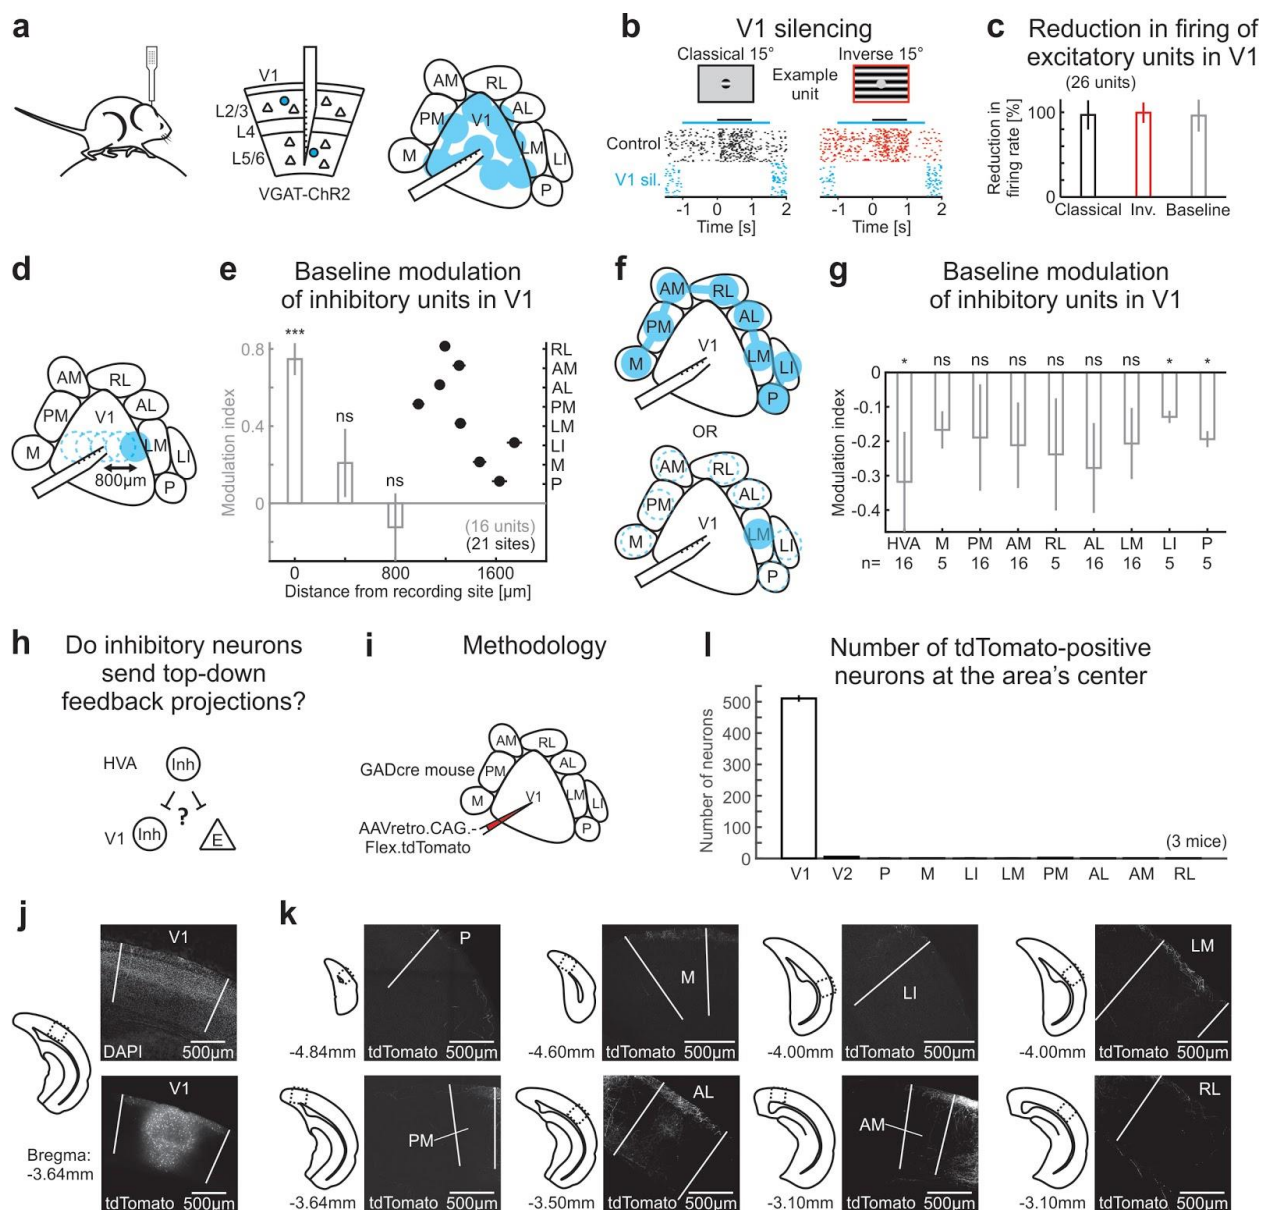

808

809 **Extended Data Figure 7 | Strong silencing by spatially restricted excitation of local inhibitory units.** **a**,  
 810 Experimental configuration. A silicon probe was inserted in V1, spanning all cortical layers, in mice expressing  
 811 Channelrhodopsin-2 in inhibitory neurons (VGAT-ChR2). To assess the strength of inhibition of excitatory units when  
 812 using the laser scanning technique (Fig. 5; see Methods), the V1 recording site as well as seven other locations were  
 813 scanned at 125 Hz. **b**, Raster plot of example excitatory unit in layer 5/6 in response to classical and inverse stimuli  
 814 of 15° in diameter under control conditions (30 trials each) and during silencing of V1 (blue; V1 sil.). Black and blue  
 815 horizontal lines are periods of stimulus presentation and V1 silencing, respectively. Classical and inverse stimuli were  
 816 presented in random order; trials with V1 silencing were randomized as well but are separated here for clarity. **c**,  
 817 Reduction in firing of excitatory units. The reduction in firing was measured as one minus the ratio between the  
 818 optogenetic condition and the control condition. Note that silencing reached nearly 100% for both responses to  
 819 classical and inverse stimuli, and for the baseline activity (26 units in 10 mice). **d**, Experimental configuration. To  
 820 assess the effect of distance on the optogenetic stimulation of inhibitory units at the recording site, two medial and  
 821 two lateral locations at 400 μm and 800 μm from the V1 recording site were targeted for laser stimulation while



822 recording in V1. **e**, Modulation of the baseline of inhibitory units. The modulation index was defined as the difference  
823 between the activity during the optogenetic and the control condition divided by the sum of the two. The modulation  
824 index was high at the recording site (at 0  $\mu\text{m}$ ) and quickly dropped with distance (gray bars; Student's t-test; 0  $\mu\text{m}$ ,  
825 \*\*\*:  $p < 10^{-6}$ ; 400  $\mu\text{m}$ , ns:  $p = 0.26$ ; 800  $\mu\text{m}$ , ns:  $p = 0.51$ ; 16 units in 8 mice). As a comparison, the distance of the  
826 HVAs from the recording site is plotted on the same axis (black dots, right y-axis; 21 recording sites, 12 mice),  
827 suggesting that when pointing the laser at HVAs, direct activation of inhibitory neurons at the V1 recording site is  
828 unlikely. **f**, Experimental configurations. To assess the effect of the laser stimulation of HVAs on inhibitory units at  
829 the recording site, all 8 (top) or individual HVAs (bottom) were targeted for laser stimulation while recording in V1  
830 (same configurations as during the experiments in Fig. 5 and Ext. Data Figs. 8 and 9). **g**, Modulation of the baseline  
831 of inhibitory units. The modulation indices were either negative or not significantly different from zero, indicating  
832 that the laser stimulation was unlikely to directly activate inhibitory neurons at the V1 recording site. Student's t-test;  
833 HVA, \*:  $p = 0.045$ ; 16 units in 8 mice; M, ns:  $p = 0.16$ ; 5 units in 4 mice; PM, ns:  $p = 0.24$ ; 16 units in 8 mice; AM,  
834 ns:  $p = 0.11$ ; 16 units in 8 mice; RL, ns:  $p = 0.46$ ; 5 units in 4 mice; AL, ns:  $p = 0.051$ ; 16 units in 8 mice; LM, ns:  $p$   
835  $= 0.064$ ; 16 units in 8 mice; LI, \*:  $p = 0.015$ ; 5 units in 4 mice; P, \*:  $p = 0.010$ ; 5 units in 4 mice. **h**, Are there many  
836 inhibitory neurons projecting from HVAs to V1? **i**, Methodology. A retrograde virus, AAVretro.CAG.Flex.tdTomato,  
837 was injected in V1 of GADcre mice to label GAD-positive neurons projecting to the site of injection. **j**, Left: Outlines  
838 of the cortical section where the confocal images shown on the right were acquired. The location of the imaged area  
839 is further indicated by the dotted square depicted on the outline. Rostro-caudal distance to bregma is indicated below  
840 the outline. Right: Average intensity projection. Top right: DAPI staining highlights the higher density of neurons in  
841 layer 4 in V1 used to define V1 borders (white lines). Bottom: The tdTomato fluorescence reveals numerous cell  
842 bodies in V1 around the site of injection and even more distal in L1. **k**, Same as in (**j**) but only for the tdTomato  
843 fluorescence and for all HVAs targeted for laser stimulation in Fig. 5 and Ext. Data Figs. 8 and 9. White lines delimit  
844 area's boundaries. **l**, Quantification of tdTomato positive neurons at the area's center. The number of tdTomato  
845 positive neurons were counted in the section containing the center of the investigated area. Note the sparse inhibitory  
846 projections from HVAs to V1 but the abundance of local inhibitory projections within V1 (3 mice). Bars represent  
847 mean  $\pm$  SEM (error bars).

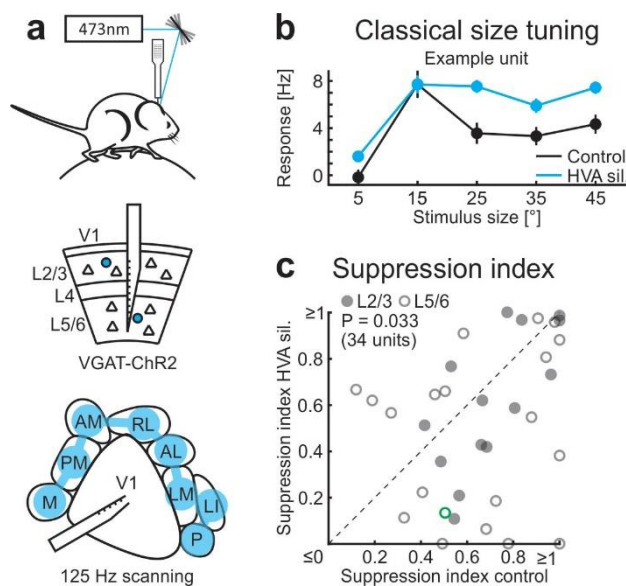

848

849 **Extended Data Figure 8 | Silencing higher visual areas reduces surround suppression in V1.** **a**, Experimental  
 850 configuration. A laser beam is scanned over HVAs around V1 for optogenetic silencing while recording in V1. **b**, Size  
 851 tuning function of an example unit (baseline subtracted firing rates) to classical stimuli with (blue) or without (black)  
 852 HVA silencing. Note the relief of surround suppression at larger stimulus sizes upon silencing HVAs. **c**, Scatter plot  
 853 of the classical suppression index with or without silencing of HVAs (see Methods). Wilcoxon signed-rank test;  $p =$   
 854  $0.033$ ; 34 units in 12 mice. Closed and open symbols are units from layer 2/3 and 5/6, respectively. Green symbol  
 855 represents the example neuron shown in **(b)**. Data points represent mean  $\pm$  SEM.

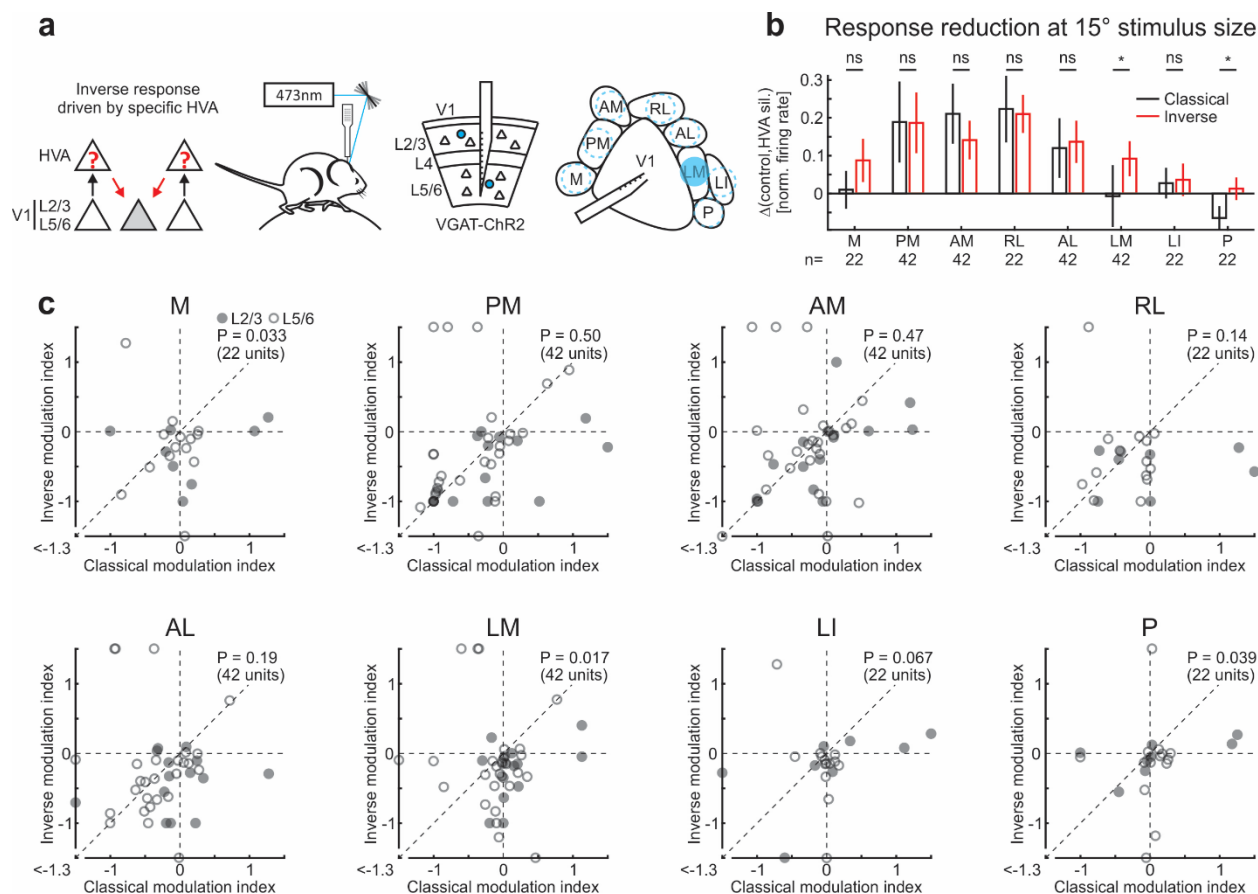

856

857 **Extended Data Figure 9 | Silencing individual higher visual areas differentially affects responses to classical**  
 858 **and inverse stimuli. a**, Schematic of results and experimental configuration. Individual HVAs are targeted for  
 859 optogenetic silencing while recording in V1. **b**, Difference in firing rates (baseline subtracted and normalized) between  
 860 control conditions and individual HVA silencing for classical and inverse stimuli. Wilcoxon signed-rank test; M, ns:  
 861  $p = 0.18$ ; 22 units in 5 mice; PM, ns:  $p = 0.46$ ; 42 units in 12 mice; AM, ns:  $p = 0.88$ ; 42 units in 12 mice; RL, ns:  $p =$   
 862  $0.81$ ; 22 units in 5 mice; AL, ns:  $p = 0.20$ ; 42 units in 12 mice; LM, \*:  $p = 0.013$ ; 42 units in 12 mice; LI, ns:  $p = 0.51$ ;  
 863 22 units in 5 mice; P, \*:  $p = 0.020$ ; 22 units in 5 mice. **c**, Scatter plot of the modulation indexes of individual HVA  
 864 silencing for responses to classical and inverse stimuli (see Methods). Closed and open symbols are units from layer  
 865 2/3 and 5/6, respectively. Wilcoxon signed-rank test; M,  $p = 0.033$ ; 22 units in 5 mice; PM,  $p = 0.50$ ; 42 units in 12  
 866 mice; AM,  $p = 0.47$ ; 42 units in 12 mice; RL,  $p = 0.14$ ; 22 units in 5 mice; AL,  $p = 0.19$ ; 42 units in 12 mice; LM,  $p =$   
 867  $0.017$ ; 42 units in 12 mice; LI,  $p = 0.067$ ; 22 units in 5 mice; P,  $p = 0.039$ ; 22 units in 5 mice. Note that for the visual  
 868 stimulus parameters used here, LM showed the strongest effect in preferentially reducing responses to inverse stimuli.  
 869 Bars represent mean  $\pm$  SEM (error bars).

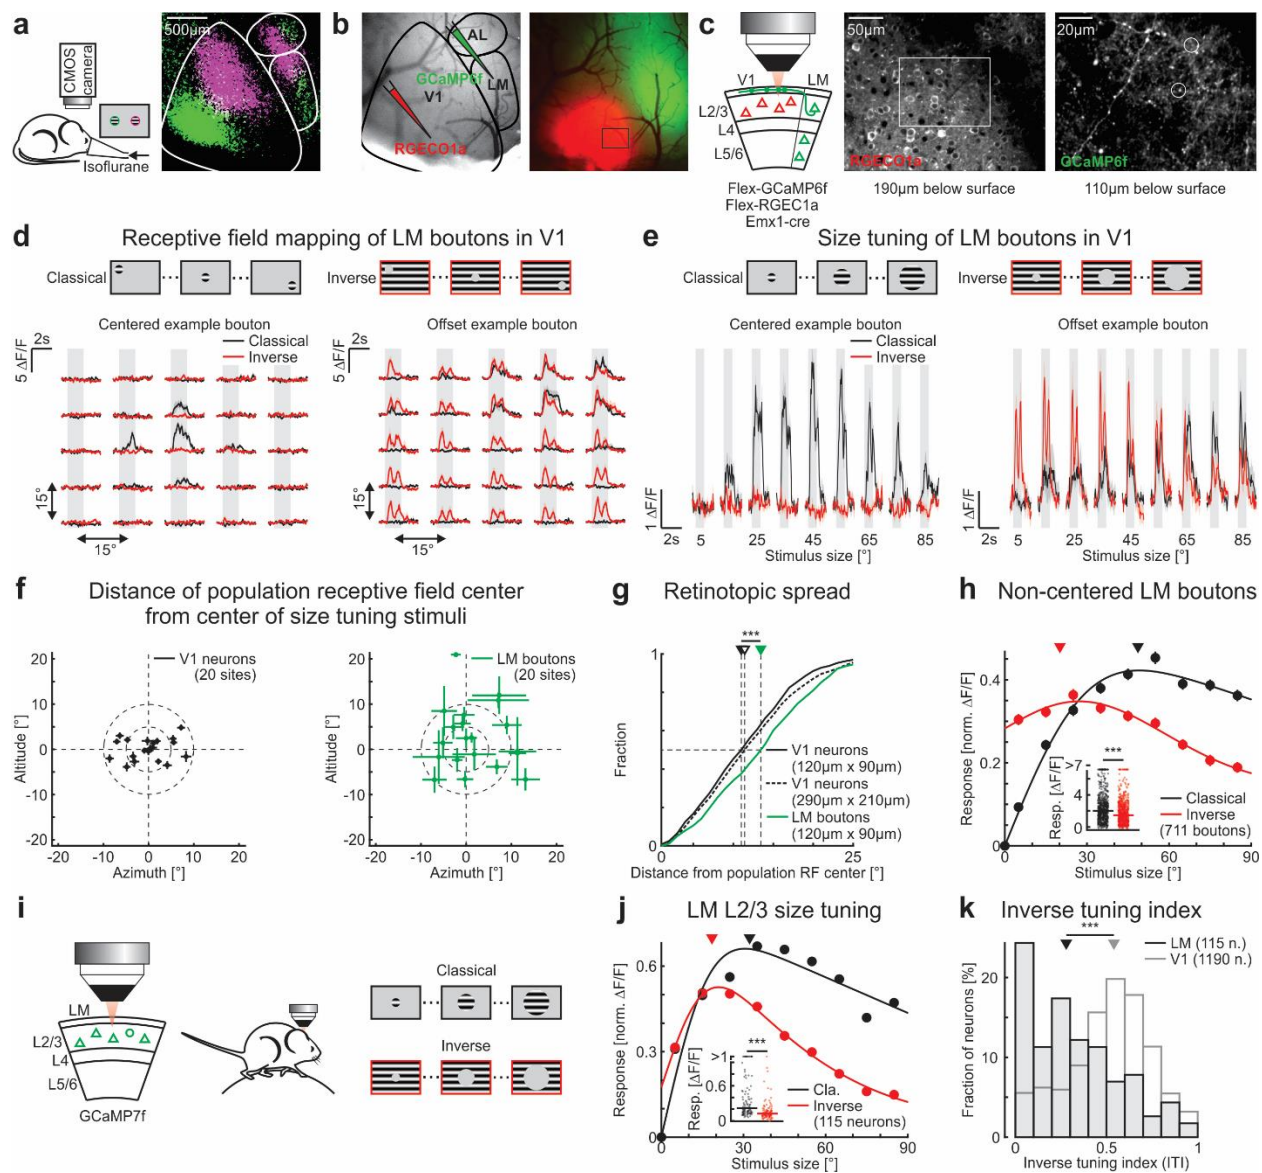

870

871 **Extended Data Figure 10 | Dual-color imaging of LM boutons and their putative V1 targets.** **a**, Left:  
 872 Experimental configuration. To localize V1 and LM, we used intrinsic optical imaging (see Methods). Right: Response  
 873 map to a nasal (magenta) and temporal patch of gratings (green). White lines represent area borders. **b**, Left:  
 874 Blood vessel pattern overlaid with area borders defined by the intrinsic map (black lines). The red-shifted calcium indicator  
 875 RGECE1a was injected in V1 and GCaMP6f was injected in LM. Right: Fluorescence of calcium indicators in V1  
 876 and LM. The black square delimits the example imaging site shown in (c). Same scale bar as in (a). **c**, Left: The  
 877 responses of LM boutons and of V1 cell bodies were recorded within the same cortical location. Center: Example  
 878 imaging site of V1 cell bodies recorded 190  $\mu\text{m}$  below surface. The white square delimits the example imaging site  
 879 shown on the right. Right: Example imaging site of LM boutons in V1 recorded 110  $\mu\text{m}$  below surface. **d**, Top:  
 880 Schematic of receptive field mapping. Left: Trial-averaged calcium responses from an example LM bouton aligned to  
 881 its putative V1 target. Right: same but from an example bouton that is retinotopically offset with respect to its putative  
 882 V1 target. **e**, Top: Schematic of stimuli used for size tuning functions. Left and right: Trial-averaged calcium responses  
 883 from the same example neurons as in (d). **f**, Left: Distance of population-averaged receptive field center of V1 neurons  
 884 from center of size tuning stimuli (20 sites in 5 mice). Right: same for LM boutons. Note that all average V1 receptive  
 885 field centers are located within 10 $^\circ$  and that average LM receptive field centers are more spread with larger standard

886 deviations. **g**, Retinotopic spread measured as cumulative distance from population-averaged receptive field center.  
887 The fFRF centers of LM boutons (solid green line) were more retinotopically spread than V1 neurons measured over  
888 the same cortical surface (solid black line) or measured over approximately 6 times the surface of the LM bouton site  
889 (dotted black line). Wilcoxon rank-sum test; LM-V1 same surface, \*\*\*:  $p < 10^{-4}$ ; LM-V1 6 $\times$  surface, \*\*\*:  $p = 3.1 \times$   
890  $10^{-4}$ ; LM, 311 boutons in 5 mice; V1 same surface, 530 neurons in 5 mice; V1 6 $\times$  surface, 2352 neurons in 5 mice. **h**,  
891 Population-averaged size tuning function of LM boutons (711 boutons in 5 mice) that are NOT retinotopically aligned  
892 with their V1 target. Note that both classical and inverse stimuli were presented at the fFRF location of their putative  
893 V1 targets (see Methods) and NOT at the fFRF location of the imaged LM boutons. Solid lines are fits to the data (see  
894 Methods). Triangles are median preferred size. Insets: Maximum responses. Horizontal lines, medians. **i**, Experimental  
895 configuration. **j**, Population-averaged size tuning functions for classical and inverse stimuli. Solid lines are fits to the  
896 data (see Methods). Triangles are median preferred size. Insets: Maximum responses. Horizontal lines, medians.  
897 Wilcoxon signed-rank test; \*\*\*:  $p < 10^{-9}$ ; 115 neurons in 3 mice. Data points represent mean  $\pm$  SEM (error bars,  
898 respectively). **k**, Distribution of inverse tuning indices (ITIs) of LM (black) and V1 neurons (gray; same neurons as  
899 in Fig. 1c; 0: classical only; 0.5 equal peak response to classical and inverse stimuli; 1: inverse only; see Methods).  
900 Triangles above the distribution indicate medians. Wilcoxon rank-sum test; \*\*\*:  $p < 10^{-10}$ ; 115 neurons in 3 mice and  
901 1190 neurons in 9 mice for LM and V1, respectively.
